REVIEW

# Potential long-term effects of SARS-CoV-2 infection on the pulmonary vasculature: Multilayered cross-talks in the setting of coinfections and comorbidities

Rahul Kumar<sup>1,2</sup>, Öznur Aktay-Cetin<sup>3,4</sup>, Vaughn Craddock<sup>5</sup>, Daniel Morales-Cano<sup>6,7</sup>, Djuro Kosanovic<sup>8</sup>, Angel Cogolludo<sup>9,10,11</sup>, Francisco Perez-Vizcaino<sup>9,10,11</sup>, Sergey Avdeev<sup>8</sup>, Ashok Kumar<sup>5</sup>, Anil Kumar Ram<sup>5</sup>, Stuti Agarwal<sup>12</sup>, Ananya Chakraborty<sup>12</sup>, Rajkumar Savai<sup>3,4,13,14</sup>, Vinicio de Jesus Perez<sup>12</sup>, Brian B. Graham<sup>1,2</sup>, Ghazwan Butrous<sup>15</sup>, Navneet K. Dhillon<sup>5\*</sup>

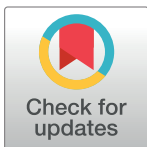

**OPEN ACCESS**

**Citation:** Kumar R, Aktay-Cetin Ö, Craddock V, Morales-Cano D, Kosanovic D, Cogolludo A, et al. (2023) Potential long-term effects of SARS-CoV-2 infection on the pulmonary vasculature: Multilayered cross-talks in the setting of coinfections and comorbidities. *PLoS Pathog* 19(1): e1011063. <https://doi.org/10.1371/journal.ppat.1011063>

**Editor:** Kenneth Stapleford, NYU Langone Health, UNITED STATES

**Published:** January 12, 2023

**Copyright:** © 2023 Kumar et al. This is an open access article distributed under the terms of the [Creative Commons Attribution License](https://creativecommons.org/licenses/by/4.0/), which permits unrestricted use, distribution, and reproduction in any medium, provided the original author and source are credited.

**Funding:** This study was supported by the American Heart Association Grant 19CDA34730030 (RK), ATS Foundation/Pulmonary Hypertension Association Research Fellowship (RK), Cardiovascular Medical Research and Education Fund (RK) and United Therapeutics Genesis Innovative Research Award (RK); NIH grants R01HL135872 and P01HL152961 (BBG); NIH R01HL129875 (NKD); Spanish Ministry of Science and Innovation grant PID2020-117939RB-I00 (AC). Educational grant for IPVD consortium from Cardiovascular Medical Research and Education Fund (GB). The funders had no role in

1 Department of Medicine, University of California San Francisco, San Francisco, California, United States of America, 2 Lung Biology Center, Zuckerberg San Francisco General Hospital, San Francisco, California, United States of America, 3 Max Planck Institute for Heart and Lung Research, Member of the German Center for Lung Research (DZL), Member of the Cardio-Pulmonary Institute (CPI), Bad Nauheim, Germany, 4 Institute for Lung Health (ILH), Justus Liebig University, Giessen, Germany, 5 Division of Pulmonary and Critical Care Medicine, Department of Internal Medicine, University of Kansas Medical Center, Kansas City, Kansas, United States of America, 6 Centro Nacional de Investigaciones Cardiovasculares (CNIC), Madrid, Spain, 7 Department of Clinical Medicine, Aarhus University, Aarhus, Denmark, 8 Department of Pulmonology, I.M. Sechenov First Moscow State Medical University (Sechenov University), Moscow, Russia, 9 Department of Pharmacology and Toxicology, School of Medicine, Universidad Complutense de Madrid, Madrid, Spain, 10 Ciber Enfermedades Respiratorias (Ciberes), Spain, 11 Instituto de Investigación Sanitaria Gregorio Marañón (IISGM), Madrid, Spain, 12 Division of Pulmonary, Allergy, and Critical Care Medicine, Stanford University Medical Center, California, United States of America, 13 Department of Internal Medicine, Justus Liebig University Giessen, Member of the DZL, Member of CPI, Giessen, Germany, 14 Frankfurt Cancer Institute (FCI), Goethe University, Frankfurt am Main, Germany, 15 Cardiopulmonary Sciences, University of Kent, Canterbury, United Kingdom

☉ These authors contributed equally to this work.  
\* [ndhillon@kumc.edu](mailto:ndhillon@kumc.edu)

## Abstract

The Coronavirus Disease 2019 (COVID-19) caused by Severe Acute Respiratory Syndrome Coronavirus 2 (SARS-CoV-2) and its sublineages pose a new challenge to health-care systems worldwide due to its ability to efficiently spread in immunized populations and its resistance to currently available therapies. COVID-19, although targeting primarily the respiratory system, is also now well established that later affects every organ in the body. Most importantly, despite the available therapy and vaccine-elicited protection, the long-term consequences of viral infection in breakthrough and asymptomatic individuals are areas of concern. In the past two years, investigators accumulated evidence on how the virus triggers our immune system and the molecular signals involved in the cross-talk between immune cells and structural cells in the pulmonary vasculature to drive pathological lung complications such as endothelial dysfunction and thrombosis. In the review, we emphasize recent updates on the pathophysiological inflammatory and immune responses associated with SARS-CoV-2 infection and their potential long-term consequences that may consequently lead to the development of pulmonary vascular diseases.

study design, data collection and analysis, decision to publish, or preparation of the manuscript.

**Competing interests:** The authors have declared that no competing interests exist.

## 1. Introduction

Despite the significant progress that has been made in understanding the host–pathogen interaction with Severe Acute Respiratory Syndrome Coronavirus 2 (SARS-CoV-2), several critical questions remain unanswered, most of which are being actively addressed by ongoing preclinical and clinical studies. Perhaps foremost is identifying the genetic and environmental risk factors that result in symptomatic versus asymptomatic infection and a severe versus mild clinical course once symptomatic. Additionally, although some patients infected with SARS-CoV-2 recover after infection, many patients do not recover completely and continue having symptoms. The impact of post-acute sequelae of Coronavirus Disease 2019 (COVID-19) (PASC), also known as “Long-COVID-19,” “Long-term COVID-19,” or “Long-haul COVID-19,” is a primary concern and needs serious attention. This group of patients, even those described as “mild,” presents cardiovascular, neurologic, dermatologic, and pulmonary ailments. The abnormal lung functions are accompanied by persistent dyspnea, general neurological decay, smell and taste disturbances, and chronic fatigue [1].

The acute effects of SARS-CoV-2 infection including increased inflammation, alveolar damage, thrombosis, edema, and accumulation of cytotoxic molecules in lung vasculature may persist resulting in long-term complications in COVID-19-recovered patients [2,3]. A major concern is a persistent pathology of the pulmonary vasculature in long COVID. There is a possibility that we might see a higher prevalence of pulmonary hypertension (PH) cases and severe lung complications than previously reported based on the following *hypotheses*, which need to be investigated:

1. There may be persistently impaired physiological gas exchange due to damaged lung architecture including the vasculature.
2. Primed immune cells due to viral infection may change their phenotype to detect autoantigens and trigger autoimmune diseases, or there may be persistent viral RNA or proteins. For example, there may be a shift towards a regulatory T cell phenotype, which can contribute to autoimmune disease [4,5].
3. Microthrombi that developed during acute infection may persist and propagate, or there may be the development of late thrombi due to the locally activated immune system or persistent lung damage.
4. COVID-19 patients with other coinfections, who live at high altitudes, or who have preexisting autoimmune or cardiovascular diseases may be at particular risk for developing PH long term [6,7].

This review will elaborate on these hypotheses and discuss the potential for the long-term development of pulmonary vascular disease (PVD) complications focusing on the COVID-19-triggered inflammatory pathways that damage the pulmonary vasculature network that might contribute to long COVID-19 pathology.

## 2. The acute pathophysiology of COVID-19

SARS-CoV-2 mainly targets respiratory tract and alveolar epithelial cells, expressing high levels of angiotensin-converting enzyme 2 (ACE2) receptors [8]. The ACE2 is the known cellular receptor and a necessary entry point for SARS-CoV-2 infection [8] via binding of Spike (S) surface glycoprotein (Fig 1). Heparan sulfate acts as a coreceptor enhancing the attachment of the virus [9]. S protein is cleaved by the host transmembrane serine protease 2 (TMPRSS2) and furin in a process known as S protein priming, essential for fusing the virus with the cell membrane [10]. After the invasion, the virus facilitates its multiplication in airway epithelial

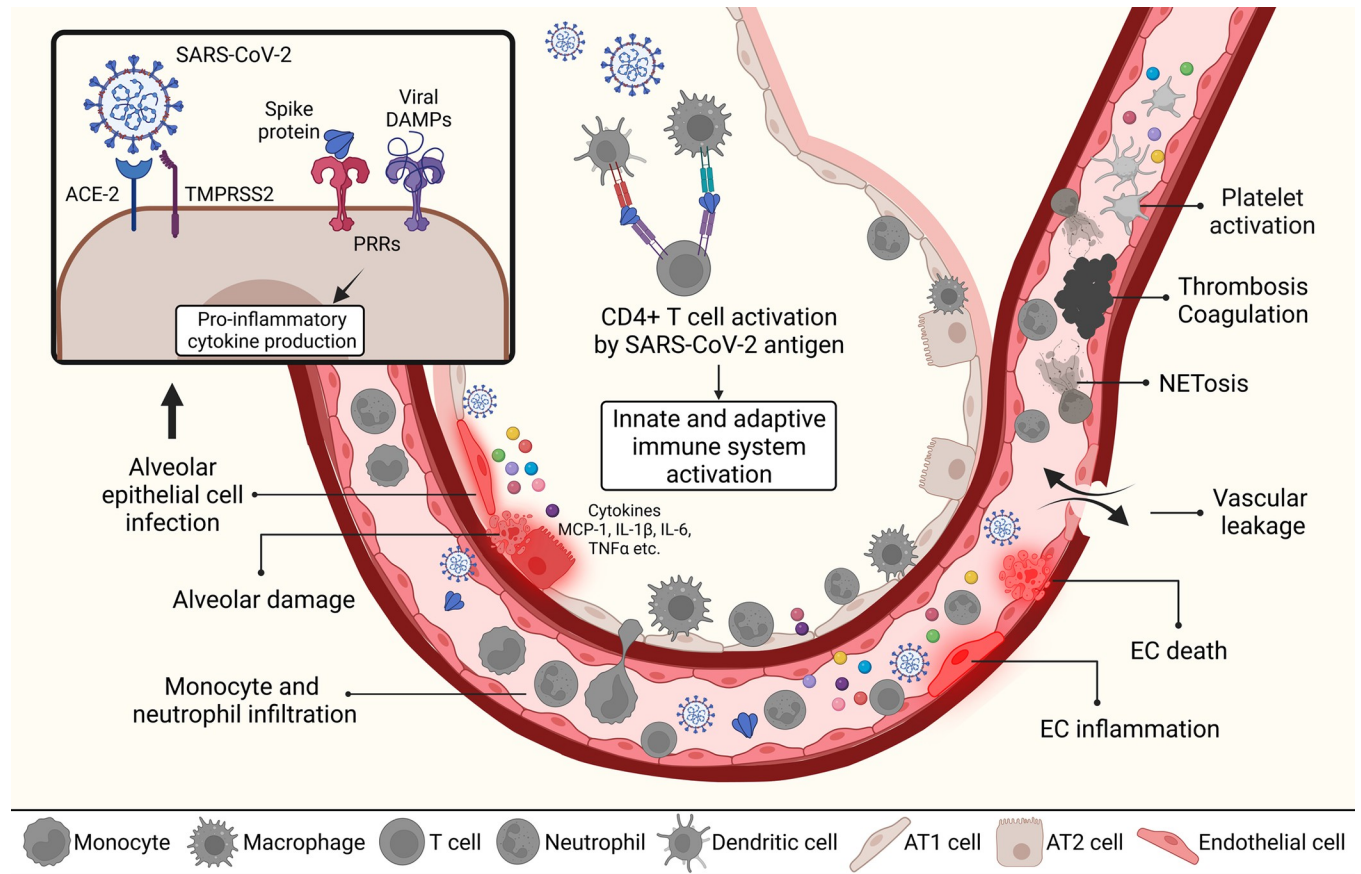

**Fig 1. Acute response to SARS-CoV-2 infection in alveolar and vascular compartments.** SARS-CoV-2 by utilizing ACE2 and TMPRSS2 invades epithelial layers to enter in alveolar compartment. Infected cell then releases DAMPs and PAMP molecules to alert immune system. While antigen presenting cells process and present SARS-CoV-2 antigen to CD4+ T cells, activation of innate and adaptive immune systems and production of inflammatory cytokines such as MCP-1, IL-1 $\beta$ , IL-6, and TNF $\alpha$  take place. These inflammatory monocytes cause production and activation of tissue factors that induce endothelial dysfunction. EC inflammation and cell death disrupts endothelial barrier and result in vascular leakage. Vascular neutrophilic inflammation can mediate platelet activation via proinflammatory cytokines to establish immune thrombosis. NET formation can contribute to prothrombotic state in hyperinflammation. Created with [BioRender.com](https://www.biorender.com). ACE2, angiotensin converting enzyme 2; DAMP, damage-associated molecular pattern; IL, interleukin; PAMP, pathogen-associated molecular pattern; PRR, pattern recognition receptor; SARS-CoV-2, Severe Acute Respiratory Syndrome Coronavirus 2; TMPRSS2, transmembrane serine protease 2; TNF, tumor necrosis factor.

<https://doi.org/10.1371/journal.ppat.1011063.g001>

cells. Subsequently, infected host cells release damage-associated molecular patterns (DAMPs). These DAMPs and viral RNA are recognized by pattern recognition receptors (PRRs) on neighboring epithelial cells and other resident cells such as alveolar macrophages (AMs). Upon this recognition, inflammatory and antiviral effects are mediated via activation of the signal transducers and activators of transcription STAT 1-2/interferon regulatory factor (IRF) 9/interferon (IFN)-stimulated genes (ISGs) axis or by the activation of proinflammatory transcription factors such as nuclear factor kappa-light-chain-enhancer of activated B cells (NF- $\kappa$ B) that induces expression of tumor necrosis factor (TNF)  $\alpha$  and interleukin (IL)-6 proinflammatory cytokines to generate a local inflammation for the recruitment of monocytes, macrophages, neutrophils, and lymphocytes. As programmed, resident and recruited immune cells are responsible for virus clearance, resolution, and recovery. However, when the immune system is hyperactivated and impaired releasing a wide range of proinflammatory cytokines and chemokines, it causes a pathological “cytokine storm” as observed in COVID-19 patients.

The resulting pathological components observed in the lung compartment include diffuse alveolar damage (characterized by type II pneumocyte hyperplasia, epithelial necrosis, fibrin

deposition, and hyaline membrane formation [9–11]; edema; chronic interstitial inflammation; multinucleated giant cells [9,12]; and bronchopneumonia [11]). In addition, it has been established that COVID-19 pathology is associated with significant involvement of the vascular endothelial dysfunction [13]. Multiple histopathological reports show disruption of intercellular junctions, cell swelling, and a loss of contact with the basal membrane, with evidence of apoptosis, pyroptosis, and lymphocytic inflammation of the endothelium. In addition, vascular thrombosis associated with microangiopathy, occlusion of alveolar capillaries, and intussusceptive angiogenesis have been reported [14–16]. Further elevated D-dimers [17,18] and thromboelastogram data [19], together with higher rates of clinical deep vein thrombi and pulmonary emboli [20,21], have been documented as aberrant coagulation profiles. Thus, endothelial cells are essential contributors to the initiation and propagation of severe COVID-19 [22], although the detailed pathobiology is still unclear [17,23]. Endothelial cell injury may be indirect via circulating factors such as activated innate immune cells or thromboembolic or infection of adjacent epithelial or stromal cells. All these alveolar and vascular changes result in ventilation and perfusion mismatch [16,17,24–27].

### 2.1. Inflammatory and immunological response to SARS-CoV-2 infection

Many immune cells contribute to cytokine storm during the hyperinflammatory phase of COVID-19 as the accumulation of monocytes, macrophages, neutrophils, and T cells in the lungs was reported following SARS-CoV-2 infection [12]. Resident lung macrophages in the alveolar lumen known as AMs are the first line of defense against pathogens. Single-cell RNA sequencing analysis reported SARS-CoV-2 infection-mediated depletion of AMs and substituting those AMs with monocyte-derived macrophages in lung tissue of severe COVID-19 patients [28]. One recent study showed that M1 AMs accelerate viral spread since SARS-CoV-2 replication is facilitated in M1 macrophages effectively, whereas M2 AMs can restrict the spread [29]. Another report showed that CCL2 and CCL7 chemokines, which are responsible for the recruitment of macrophages, were elevated in bronchoalveolar fluid of severe COVID-19 patients [18]. On the other hand, infected circulating monocytes were also reported to contribute to inflammation [30]. Intermediate monocytes were found to release a high amount of IL-6 to improve pulmonary inflammation upon SARS-CoV-2 infection [30,31]. Consequently, monocytes and macrophages as highly plastic cells are crucial in SARS-CoV-2 infection, and it is essential to investigate their multisided effects to understand the pulmonary disease pathology.

Cytotoxic activation of CD4<sup>+</sup> and CD8<sup>+</sup> T cells and immunological memory help with antiviral immunity and clear the virus. In SARS-CoV-2 infection, T cell responses can be defined as a double-edged sword. On one hand, defective T cell response can contribute to inflammation and tissue damage, which worsens the outcomes of the disease [31]. On the other hand, T cell loss (lymphopenia) is a condition observed in SARS-CoV-2 infection and is associated with disease severity [32]. In severe cases of COVID-19, both CD4<sup>+</sup> and CD8<sup>+</sup> T cell numbers were reduced compared to moderate cases [33–36]. Upon viral infection, the innate immune system augments the expression of type I IFN to prime adaptive immune system. However, in COVID-19, impaired and delayed IFN responses correlate to disease severity [37,38]. Additionally, Yang and colleagues reported that CD8<sup>+</sup> T cell differentiation is suppressed during prolonged SARS-CoV-2 positivity [39]. Imbalance between T cell responses and T cell differentiation mechanisms can be linked to continuous inflammation leading to abnormal overactivation of immune cells that might worsen the long-term outcomes in COVID-19-recovered individuals.

Neutrophils as other important contributors of cytokine storm were found elevated in the blood of COVID-19 patients. Neutrophils are recruited to pulmonary tissue upon



hyperactivation of monocytes and macrophages in the lung. High neutrophil numbers in COVID-19 are positively correlated with disease severity, organ damage, and mortality [40]. Recruited neutrophils then develop neutrophilic vascular inflammation and immunothrombosis [41]. Neutrophil extracellular traps (NETs), which are formed through a biological process called NETosis (neutrophil death), have emerged as a key player in mediating inflammatory response [41–44]. NETs have antiviral effects but they can also accelerate the inflammation process [41]. Therefore, protective behaviors of neutrophils can be rapidly converted into a dysfunctional phenotype to exacerbate the disease progression [41,43].

IL-6 and TNF- $\alpha$  are major cytokines in the case of hyperinflammation, and they are mainly released by macrophages and lymphocytes. In a recent paper, patients with severe COVID-19 and high O<sub>2</sub> requirements exhibited marked increases in circulating levels of extracellular vesicles (EVs), a lipid membrane-enclosed vesicular structures that carry a variety of cellular cargo such as lipids, nucleic acids, and proteins for cellular communications [45]. EVs rich in IL-6 and TNF family cytokines, the receptor for advanced glycation end products (RAGE), extracellular newly identified RAGE-binding protein (EN-RAGE), and programmed death-ligand 1 (PD-L1) are associated with disease severity [46]. EV-associated PD-L1 could contribute to hyperinflammation as well as to lymphopenia due to its interaction with PD-1, which induces anergy and apoptosis in T cells. Neutrophil markers including lectin-like oxidized low-density lipoprotein (LDL) receptor 1 and myeloperoxidases were also found to be linked to EVs from the critically ill patients.

Besides the receptor function of ACE2 for SARS-CoV-2, its catalytic activity has important pathophysiological consequences for COVID-19 [47]. First, ACE2 converts angiotensin I into Ang1-9 and angiotensin II into Ang1-7, thereby negatively regulating the renin-angiotensin-aldosterone system (RAAS), promoting vasodilation and antioxidant and anti-inflammatory effects [48]. Secondly, ACE2 degrades des-Arg<sup>9</sup>-bradykinin and prevents the subsequent release of proinflammatory chemokines and exaggerated lung injury [49]. However, during the SARS-CoVs infection, ACE2 is down-regulated, which is expected to result in a loss of its protective anti-inflammatory effects and exacerbated vascular injury and pneumonia progression [47]. The interaction of the Spike protein can cause a marked reduction in the membrane-bound form of ACE2 both in cultured cells *in vitro* [50] and hamster lungs *in vivo* [51]. Additionally, ACE2 autoantibodies, which inhibit the catalytic activity of the enzyme, are increased in COVID-19 patients and may lead to enhanced proinflammatory responses and severity of COVID-19 outcome [52]. Taken together, these findings suggest that cytokine storm due to immune cell dysfunction in COVID-19 disease results in cellular and tissue damage. Signals from unhealed damage in tissue and organs might fuel continuous low-grade inflammation at local or systemic levels potentially translating into long-term post-COVID complications as discussed later in this review.

Several anti-inflammatory therapies have been clinically studied in COVID-19, including blocking the IL6-receptor (tocilizumab), Janus kinases (JAK) 1 and 2 (—baricitinib), and corticosteroids (dexamethasone—which is broadly immunosuppressant). The data on IL-6 receptor inhibition on acute endpoints in COVID-19 have been somewhat mixed, with no clear benefit in severe disease and a modest benefit in more mild disease (hospitalized and receiving continuous oxygen, but not requiring high flow nasal cannula or mechanical ventilation) [53,54]. Use of baricitinib to block JAK1/2, which are intracellular proinflammatory signaling mediators, has been more promising particularly in mild but hospitalized disease [55]. In contrast, dexamethasone was found to be of benefit in those with particularly severe COVID-19 [56]. On the basis of these data, current clinical guidelines advise baricitinib (or tocilizumab more modestly) for mild COVID-19, and dexamethasone in combination with baricitinib or tocilizumab for severe COVID-19. Importantly, all of these clinical data emphasize early

endpoints (such as progression to severe disease, or mortality/ventilator free days out of the first few weeks) and do not assess the prevalence of PH at later time points.

## 2.2. Thromboinflammation and COVID-19

Thrombosis is a significant morbidity and mortality source for hospitalized COVID-19 patients and has been linked to hypoxia and organ failure [14,57,58]. Even after 160 years since its conception, Virchow's triad is still a remarkable predictor of the location of clot initiation [59]. The broad vertices of the triad are (1) stasis (flow), (2) vessel wall injury (surface), and (3) hypercoagulability (blood constituents). In reality, these three factors are spatially and temporally highly interlaced. Flow stasis (vertex #1) is probably an established clinical risk factor for deep vein thrombosis (DVT) [60]. Slow flow ( $<100\text{ s}^{-1}$ ) in valve pockets also serves as a trigger for vessel wall injury (vertex #2), which also leads to accumulation of coagulation factors, and increases blood viscosity due to rouleaux formation (vertex #3) [61]. Overall, the Virchowian categorization is convenient for a reductionistic understanding of the complexity of COVID-19-associated coagulopathy.

Stasis will be contributed by myocardial injury, which is a relatively common feature of COVID-19 [62], and low cardiac output is an important complication in sepsis generally [63]. Venous thromboembolic events are much more common than arterial thromboembolic events among COVID-19 patients—the venous system is characterized by more sluggish blood flow than the arterial system, suggesting that stasis and not high shear rates, and hence secondary but not primary hemostasis, is the driver of clot initiation [64–66]. Regions of lung particularly injured by the viral infection and are hypoxic will have vasoconstriction resulting in locally decreased blood flow, which could also contribute to regional stasis.

Usually, quiescent endothelial surfaces are important hemostatic regulators. The anticoagulant functions on the endothelial surfaces include binding of thrombin to thrombomodulin; conversion of protein C to activated protein C; and clearance of activated coagulation factors and thrombin by antithrombin. In addition, the endothelium also regulates fibrinolysis by maintaining a balance between the production of tissue plasminogen activator that promotes fibrinolysis and plasminogen activator inhibitor that inhibits it [67]. However, damage to endothelial cells due to injury or inflammation may disrupt their hemostatic regulation leading them to adopt a procoagulant state that can lead to thrombotic events [68]. It has been shown that COVID-19 patients present with elevated levels of soluble thrombomodulin, von Willebrand Factor (VWF), and proinflammatory IL-6, all indicative of procoagulant endothelial phenotype, i.e., endotheliopathy [19,69,70]. Functionally, VWF facilitates platelet adhesion to the injured endothelial surface, triggering a primary hemostatic cascade. This, together with a relative decrease in VWF protease: ADAMTS-13 (A disintegrin and metalloproteinase with a thrombospondin type 1 motif, member 13) reported in COVID-19 patients, may result in larger VWF structures in circulation. These changes are only modest, which is consistent with thrombotic microangiopathy and not consumptive thrombocytopenia seen in COVID-19-associated coagulopathy [71,72].

The hypercoagulation and thrombosis in COVID-19-associated coagulopathy can be directly associated with dysregulated functions of immune cells due to cytokine storm [73]. The activation of the innate immune system, i.e., neutrophils and monocytes, modulates both intrinsic and extrinsic coagulation pathways. Upon activation, neutrophils and monocytes copiously release various inflammatory cytokines, including IL-8, TNF- $\alpha$ , and, most notably, IL-6, which has been associated as an indicator of mortality among severe COVID-19 patients [70,74]. IL-6 is a potent activator of platelets, and hyperactive platelets that display faster aggregation, showing increased spreading on both fibrinogen and collagen has been observed in

COVID-19 patient plasma [75]. Neutrophils undergoing NETosis and forming NETs is emerging as an important contributor to immune thrombosis in COVID-19 [41–43] and may serve as a potential target to control coagulopathy. Their role in sepsis and acute respiratory distress syndrome (ARDS) pathogenesis is well documented, with NETs causing scattered microthrombi leading to multiorgan failure and death [76]. Platelet-leukocyte complexes have also been isolated from the circulation of COVID-19 patients. These complexes demonstrate an up-regulation in tissue factor expression, further contributing to the hypercoagulable state observed in COVID-19 patients [77]. In addition, endothelial cell adhesion molecules are up-regulated by proinflammatory cytokines, which establish a prothrombotic state in the microvasculature. Circulating EVs loaded with tissue factor, VWF, and many other thrombosis and coagulopathy mediators from critically ill COVID-19 patients were observed to cause endothelial apoptosis [46]. Lastly, reduced ACE2 in response to SARS-CoV-2 infection promotes a prothrombotic state [78]. All these changes contribute to the high rate of thrombotic complications in acute COVID-19.

Anticoagulant therapy for COVID-19 has been studied in multiple clinical studies, focusing specifically on acute endpoints. In general, these studies have not found benefit in critically ill patients [79], but there is some positive signal in more mild (but still hospitalized) patients, indicating that anticoagulation may prevent progression to more severe disease [80,81]. However, the current clinical evidence and guidelines suggest that anticoagulant therapy should not be used in all patients with SARS-CoV-2 infection [82].

### 2.3. Pulmonary endothelial dysfunction

Under normal conditions, vascular endothelium is the crucial barrier between pulmonary circulation and the lung interstitium. It possesses a series of properties that control vascular tone, inflammation, oxidative stress, vascular permeability, and the structure of the vessels and also provide a crucial interface in host defenses as front line [83,84]. However, whether this is caused by direct viral infection of the endothelium or inflamed-induced endothelial activation remains controversial. Multiple studies have reported that endothelial cells from different vascular beds express the ACE2 receptor and TMPRSS2 protease, which are required for SARS-CoV-2 infection [85,86], allowing virus to theoretically infect pulmonary endothelial cells. According to a recent study by Joffre and colleagues [87], SARS-CoV-2 can proliferate inside of human microvascular endothelial cells (HMVECs) and, as a result, activate endothelial cells, causing them to release IL-6, PAI-1, VEGF, IL-8, and/or CCL-2, with some changes depending on the patient donor. This is in agreement with the presence of viral elements within endothelial cells in the lung tissues from patients who died of COVID-19 [17]. However, Schimmel and colleagues [88] discovered that SARS-CoV-2 infection of primary human endothelial cells cannot result in the production of infectious virions and contribute to viral amplification. Nonetheless, they reported that virus may enter endothelial cells or respond to infection in the neighboring pulmonary epithelial cells or viremia by inducing the production of proinflammatory cytokines and adhesion molecules. Furthermore, Perico and colleagues [89] investigated the effects of SARS-CoV-2-derived Spike S1 protein on HMVECs and discovered that Spike S1 treatment resulted in dose-dependent increases in ICAM-1 and vWF, as well as increased deposition of complement protein C3 on the surface of HMVECs when cells were treated with higher concentrations of Spike S1.

Previous research has shown that during CMV, HIV-1, or HSV-1 infections [90–93], EVs can transmit viral proteins and genetic material from infected cells to healthy cells. EVs may contain S protein or its fragments, according to recent research on spike-expressing cells and examination of circulating EVs from COVID-19 patients [94–96]. Further, it's been

demonstrated that EVs released by lung epithelial cells transduced with lentiviruses encoding SARS-CoV-2 proteins transfer the viral RNA to cardiomyocytes, up-regulating the expression of inflammatory genes in the recipient cells [97] and raising the possibility that EVs may play a role in the spread of SARS-CoV-2 genomic RNA to uninfected cells. Along similar lines, one study found low copy numbers of SARS-CoV-2 RNA in exosomes extracted from COVID-19 patient plasma [98], while a more recent investigation was unable to find the viral RNA in EVs circulating in hospitalized acutely infected COVID-19 patients [96]. Additionally, Dhillon lab has observed that the plasma-derived proinflammatory EVs isolated from COVID-19 patients induce the apoptosis of pulmonary microvascular endothelial cells and this effect increase with increasing disease severity [46]. Overall, endothelial damage or dysfunction brought on directly by SARS-CoV-2 virus or viral components exposure or indirectly as a result of a systemic inflammatory cytokine storm affects the vascular endothelium's homeostatic function and therefore may serve many roles in determining or exacerbating the disease severity and mortality in COVID-19.

Dysfunction or injured endothelial cells can first lead to impairment of endothelial-dependent vasodilatation, causing ventilation-perfusion mismatch and hypoxemia, not only by a direct impairment of hypoxic pulmonary vasoconstriction but also acting as a trigger of the coagulation cascade, resulting in the coagulopathy observed in COVID-19 patients [13]. Second, loss of intravascular endothelial cells barrier integrity, characterized by the formation of intercellular gaps between endothelial cells due to cellular damage and apoptosis by SARS-CoV-2 virion or its components and/or proinflammatory cytokines [16,99], leads to increased vascular permeability. This subsequently leads to protein-rich edema fluid in airspaces, resulting in poor gas exchange and decreased blood O<sub>2</sub> levels [13]. Macrophage-originated TNF- $\alpha$  regulates vascular integrity by remodeling endothelial junctions to enable the transmigration of more immune cells [100]. As another example of cytokine-induced endothelial dysfunction, Varga and colleagues correlated monocyte and neutrophilic infiltration in arterial vessels with the apoptosis of endothelial cells in a lung specimen from a COVID-19 patient [17]. Third, on the basis of the abovementioned cytokine storm, the exposure to proinflammatory cytokines such as IL-6, IL-1 $\beta$ , and TNF- $\alpha$  released by immune cells can cause up-regulation of endothelial cell adhesion molecules, which will result in the activated state of endothelial cells [101–103]. This activated endothelial cells in turn promote the recruitment, adhesion, and migration of activated monocytes and neutrophils [104], creating an amplification loop that keeps the cytokine storm going. Dysregulation of neutrophil, NK cells, and macrophage activity has been noted to correlate with increased vascular endothelial inflammation markers [105]. To generalize, cytokine storm-based prolonged inflammation and circulation of viral components in COVID-19 directly affects pulmonary vasculature homeostasis.

### 3. Potential long-term effects of COVID-19 on the development of PVD and pulmonary hypertension

Some of the pathological features of COVID-19 are the existence of so-called “silent hypoxia” and unusual and nontypical attributes of ARDS [106–108]. The “silent hypoxia” may occur during the COVID-19 pathology, and its severity is not directly linked with the respiratory problems experienced by the patients, or in other words, the presence of “silent hypoxia” does not initially provide the significant signs, like shortness of breath in COVID-19 patients [109,110]. In addition, the severe forms of COVID-19 are characterized by significant hypoxemia (arterial hypoxia) [111]. Recent papers demonstrated that patients with COVID-19 might develop ARDS and acute cor pulmonale [112,113]. Acute cor pulmonale occurs as instant and unexpected augmentation of the pulmonary vascular resistance, and it may appear



due to the hypercapnia-associated pulmonary artery vasoconstriction [114]. According to echocardiography studies, 20% to 25% of acute COVID-19 cases report RV dysfunction, which could be linked to higher mortality [115–118]. Increased RV afterload can be secondary to pulmonary parenchymal abnormalities during acute infection, combined with macro- or micro-PVD as well as the negative inotropic, prothrombotic, and profibrotic effects of cytokine storm [119–121]. Additionally, patients with RV dysfunction and PH, in particular, experience worse clinical outcomes [117,122].

Regarding the chronic effects of SARS-CoV-2 infection and COVID-19 on pulmonary circulation and development of PH, our knowledge is still *tabula rasa*, but one may speculate this to be a potentially clinically relevant problem in coming years. According to a recent publication, the investigation of magnetic resonance imaging in COVID-19-recovered patients revealed reduced RV function [123]. Recent research from Romania revealed that 9.33% of post-acute COVID patients had PH [124]. An additional investigation using echocardiographic techniques estimated PH in 29.7% of COVID-19 patients with higher mortality [125], although right ventricular systolic pressures (RVSPs) decreased after 5 months in the patients that survived. As mentioned above, SARS-CoV-2 infection has been linked with injured endothelium, dysregulated inflammation, oxidative stress, and microthrombi [126,127], and these phenomena are also described in the pathology of PH. PH is a form of lung blood vessel disease characterized by inflammation, vasoconstriction, endothelial and smooth muscle proliferation, and dysregulated apoptosis. It has been well established that inflammation plays a key role in orchestrating PH pathophysiology [128,129]. Acute exposure with recently emerged corona virus SARS-CoV-2 and its variants shares key pathobiological signatures with PH including inflammation, alveolar epithelial damage, thrombosis, edema, and accumulation of cytotoxic molecules in the pulmonary vascular bed. Further infections and comorbidities contribute to the heterogeneity and pathophysiological consequences of PH and may promote the development of PVD in individuals with COVID-19 in years to come as hypothesized and discussed in detail in the following sections.

### 3.1. Chronic proinflammatory state and vascular injury

The development of pulmonary and cardiovascular manifestations of long COVID has been hypothesized as a consequence of increased IL-6 and TGF $\beta$  and reduced ACE2, promoting a chronic inflammatory, profibrotic, and hypercoagulable status [130,131]. During the acute phase of inflammation, anti-inflammatory factors from pulmonary structural or resident and recruited immune cells may not be sufficient to resolve the inflammation due to defects in immune response, and, therefore, full tissue repair cannot be accomplished due to unresolved inflammation. Persistent tissue damage caused by persistent inflammation in this case can be major fuel of continuous “chronic” inflammation. Endothelial damage-mediated vascular leakage is another result of SARS-CoV-2 infection-related impairment in the pulmonary vasculature. Allnoch and colleagues observed inflammatory infiltrates within the endothelial cell layer and reported endothelial inflammation-dependent vascular leakage in a SARS-CoV-2-infected golden Syrian hamster model [100]. IL-6 and TNF- $\alpha$  that are robustly high during COVID-19 have been linked to reduced BMPR2 expression [132] and associated with severe disease and death in patients with pulmonary arterial hypertension (PAH) [133–136]. Bone morphogenetic protein (BMP) and transforming growth factor-beta (TGF- $\beta$ ) are known to synergistically activate regulatory T cells to reduce inflammation and prevent autoimmune disease. Therefore, a loss of bone morphogenetic protein receptor type 2 (BMPR2) function can result in dysregulated immune cell recruitment, increased cytokine expression, and vascular infiltration by inflammatory cells into the intima [132]. Loss of pericytes during severe cases of

COVID-19 is associated with vascular inflammation [137,138]. Insufficient replenishment of pericytes can be hypothesized to address continuous vascular inflammation in post-COVID. With such examples, prolonged hyperinflammation-mediated irreversible damages and deficiencies in pulmonary vasculature upon SARS-CoV-2 infection might prevent anti-inflammatory-type immune cells and/or anti-inflammatory soluble mediators to transit from blood to inflaming tissue, and this might cause to develop chronic vascular inflammation, later involving in PVD pathogenesis, particularly PH [139].

Persistence of viral residues in lungs, blood, or other organs can also fuel inflammation at a certain degree, perhaps not at an exacerbated level but causing a continuous low grade of inflammation. Interestingly, components of SARS-CoV-2, namely Spike protein and viral RNA, have been reported to persist in circulation for up to 1 year or longer after acute SARS-CoV-2 infection in individuals with PASC symptoms [96,140]. Further, the effects of Spike protein on thrombosis and coagulopathy may be far reaching and highly significant, possibly in post-COVID syndromes as well, as in acute COVID-19.

In addition, it was reported that SARS-CoV-2 spike protein promotes hyperplasia and hypertrophy of vascular smooth muscle cells, which later might exacerbate cardiovascular outcomes [141]. Patterson and colleagues showed that SARS-CoV-2 S1 protein remained in CD16+ monocytes up to 15 months post-acute COVID-19 [142]. SARS-CoV-2 protein-expressing circulating monocytes might be directly related to prolonged inflammation, severity, and the long-term phase of COVID-19, since studies revealed the increase of intermediate (CD14+CD16+) and nonclassical (CD14<sup>lo</sup>CD16+) monocytes in COVID-19 [142]. One possible reason regarding viral particle persistence in post-sequelae pathology might be some deficiencies in protein degradation machineries upon SARS-CoV-2 infection, since SARS-CoV-2-induced autophagy dysregulations were reported [143,144]. These possible deficiencies might result in altered protein turnover rate, resulting in chronic presence of proinflammatory cytokines and viral proteins in circulation and tissues. Detection of viral RNA after SARS-CoV-2 infection has also been reported by multiple groups many months post-recovery from COVID-19 [2,3,96,145–147]. Possibly, there is an immune-escape strategy behind the persistence of undegraded RNA of SARS-CoV-2 like HIV where methylation of viral RNA was found to help avoid immune cell sensing [148,149]. Further studies will show whether SARS-CoV-2 virus pursues such an immune-escape strategy or not. On the other hand, chronic immune stimulation can also be dependent on the site of viral RNA persistence [149,150], leading to persistent symptoms with systemic inflammation versus remaining asymptomatic without fueling inflammation. Consequently, it is crucial to clarify drivers of viral persistence-regulated inflammation in long COVID.

Future studies regarding the involvement of EVs in long-term manifestations of COVID-19 will also be of high interest. EVs have been shown to contribute to vascular remodeling in PH and therefore may also contribute to the development of PH following SARS-CoV-2 infection. We previously reported EV-associated TGF- $\beta$ 1 as an important player in pulmonary vascular remodeling and fibrosis in PAH [46,151]. In addition, HIV-Nef-positive EVs are shown to contribute to the pulmonary vascular endothelial dysfunction [152]. It will be interesting to assess if EVs are involved in the long-term remodeling of alveolar and pulmonary vascular tissue as recent report from Dhillon lab suggests the presence of spike protein on small EVs circulating in individuals with long COVID or PASC [96].

Increased activity of the RAAS has been implicated in the etiology of PAH [153,154]. Augmented angiotensin II (Ang II) levels and Ang II type 1 receptor (ATR1) activation are also observed in experimental PAH and associated with disease progression and mortality in patients with idiopathic PAH [153]. RAAS inhibition attenuates PAH in experimental models [155], and it is associated with improved survival in veterans with PAH [156]. ACE2 mRNA

expression in explanted lungs from patients with PAH was strongly (approximately 6-fold) and consistently up-regulated compared to controls in four independent transcriptomic studies and the meta-analysis [157]. Likewise, up-regulated ACE2 mRNA (4-fold) has also been reported in rat lungs with PH induced by monocrotaline [158]. However, lung ACE2 protein expression was decreased in PAH and several animal models of experimental PH [159]. This seems to be due to the oncoprotein murine double minute 2 (MDM2)-mediated ubiquitination of ACE2 leading to protein degradation [159] and possibly increased disintegrin and metalloproteinase domain-containing protein 17 (ADAM17) expression [157] leading to increased ACE2 shedding in these patients. The latter is consistent with increased ACE2 protein and TNF- $\alpha$  in plasma PAH patients [135,160]. The setting is even more complex because, despite increased plasma ACE2 protein, plasma ACE2 activity was reduced in these patients, possibly due to increased autoantibodies against ACE2 [160]. To summarize, reduced lung and plasma ACE2 activity should be interpreted as deleterious for PAH. In fact, the activation of pulmonary ACE2 with recombinant ACE2 has been proposed as a therapeutic strategy for both PAH [161] to counteract the pro-oxidant, proinflammatory, and vasoconstrictor effect of the RAAS [47]. The role of ACE2 in COVID-19 is complicated by its function as the critical host receptor mediating viral entry. Therefore, Spike protein mediated down-regulation of ACE2 during SARS-COV-2 infection or postinfection, and the resulting proinflammatory status may eliminate a protective mechanism in vulnerable immunocompromised predisposed patients and may potentially trigger the development of PAH.

In conclusion, the loss of barrier function in response to chronic inflammation and endothelial activation is expected to expose sub-endothelial tissue within arterial vessels, which includes smooth muscle cells, extracellular matrix proteins (for instance, collagen), and fibroblasts. Over time, serum factors may leak through the endothelial membrane barrier and activate pulmonary arterial smooth muscle cells (PAMSCs), causing them to proliferate and release endogenous elastases that will break down connective tissue within the tunica media and adventitia. Consequently, release of fibrotic growth factors and other initiators of the vascular remodeling released by smooth muscle and adventitial cells in response may lead to the development of PH [162,163].

### 3.2. Comorbidities that may synergize with COVID-19 to predispose risks to pulmonary hypertension

**3.2.1. Heart failure.** Heart failure (HF) is a known etiology of Group 2 PH, or PH due to left-sided heart disease [164]. Patients with HF are also shown to be at much higher risk of hospitalization and death during acute COVID-19 [165]. Therefore, it is reasonable to expect that COVID-19 may exacerbate HF without resolution or return to pre-COVID-19 function in some patients. In fact, COVID-19 itself increases the risk and burden of HF after 1-year post-acute infection, suggesting that the virus can cause long-term changes to cardiac function even in patients without preexisting heart conditions [166]. Furthermore, post-COVID patients are at significantly increased risk for developing dysrhythmias, which are known to adversely affect cardiac function and exacerbate HF [166–168].

Mechanisms of HF exacerbation in COVID-19 patients may be indirect or direct. Indirect pathways may damage cardiac tissue due to the propensity for viral infections to cause tachycardia, thus increasing the workload on the heart, or could be due to acute manifestations such as increased acidity of the blood, hyperinflammation, hypoxia, and/or increased reactive oxygen species (ROS) especially in patients with severe COVID-19 [169]. Direct damage to cardiac tissue may be caused by SARS-CoV-2 infecting cardiac cells. Cardiomyocytes in heart express ACE2, the primary receptor utilized by SARS-CoV-2 for infecting cells. Consequently,

cardiomyocytes may be infected and damaged by SARS-CoV-2 [170]. If COVID-19 itself increases the risk for HF postinfection in patients without preexisting cardiac dysfunction, then acute or chronic clinical manifestations caused by SARS-CoV-2 may exacerbate cardiac dysfunction in patients with HF and cause irreversible cardiac tissue damage. If left ventricle function is decreased by these changes, then this will reduce its ability to efficiently pump blood into systemic circulation, resulting in increased pulmonary circulation pressure. Consequently, patients with chronic HF who have had COVID-19 may be put at further risk of developing PH secondary to left heart disease due to irreversible exacerbations of their preexisting condition and/or due to post-acute sequelae of COVID-19 that affects lung and cardiac function.

**3.2.2. Chronic lung diseases.** Chronic lung diseases (CLDs), namely idiopathic pulmonary fibrosis (IPF) and chronic obstructive pulmonary disease (COPD), are already known etiologies of Group 3 PH [164]. One may hypothesize that acute SARS-CoV-2 infection in patients with CLD may further increase the risk of developing PH or lead to the development of other forms of PH, such as Group 1 PAH. Acute COVID-19 may also accelerate the development and/or progression of PH secondary to CLD. Here, we will focus on how IPF may predispose someone to develop or worsen preexisting PH following acute COVID-19.

**Pulmonary fibrosis:** PH is frequently found in concomitance with IPF, and the presence of both diseases in patients is correlated with worse clinical outcomes than either disease alone [171]. This is not surprising, as IPF and PH share some common pathways in their pathophysiology. In IPF, abnormal TGF- $\beta$  signaling instigates pulmonary fibrosis and induces the expression of proteins that cause stiffening of interstitial lung tissue [172–174]. TGF- $\beta$  is also a major actor in the development and progression of PH due to its involvement in pathogenic vascular remodeling [46,173,175] by inducing endothelial-to-mesenchymal transition (EndoMT) as well as PASMC proliferation and medial hypertrophy of arteries [175]. In IPF patients, TGF- $\beta$  secreted by cells within the alveoli would theoretically be contained within the interstitial tissue of the lungs. In this case, TGF- $\beta$  is primarily exerting its effects on cells within alveoli. It may be of interest to mention some of the new report that suggest potential increase in pulmonary fibrosis clinically due to COVID-19 [176,177]. Since COVID-19 can elicit an intense “cytokine storm” that promotes alveolar tissue damage, compromises alveolar epithelial integrity, and increases capillary permeability, then contents normally contained within the alveoli may leak into the bloodstream at a much higher level than normal, allowing for TGF- $\beta$  in IPF patients to affect the pulmonary vasculature. This might predispose IPF patients who were hospitalized with severe acute COVID-19 to PAH. Interestingly, a study by Ferreira-Gomes and colleagues [178] demonstrated that TGF- $\beta$  triggers a chronic immune reaction in patients who were hospitalized with COVID-19 for up to 60 days. Furthermore, some of the recent reports suggest potential increase in life-threatening and prolonged pulmonary fibrosis clinically due to COVID-19 [179–181]. SARS-CoV-2 infection increases the risk of some patients developing pulmonary fibrosis via TGF- $\beta$  pathways [182]. These concerns suggest that TGF- $\beta$  may originate from AMs/metaplastic type 2 alveolar epithelial cells and concurrent SARS-CoV-2 infection in patients with IPF, and the resultant damage to alveolar tissue from acute COVID-19 may allow for TGF- $\beta$  to spill into the bloodstream for prolonged periods of time and instigate pulmonary vascular remodeling that can ultimately lead to the development of PAH (Fig 2).

**Pulmonary hypoxia:** It is well known that chronic pulmonary hypoxic conditions cause the development of pulmonary vascular remodeling and ultimately the occurrence of PH [183]. Pulmonary vascular remodeling that appears due to chronic and long-term exposure to high-altitude hypoxia is the key pathological characteristic of high-altitude PH (Fig 2). Studies suggest that the long-term stay or living at high altitude settings may induce the activation of the

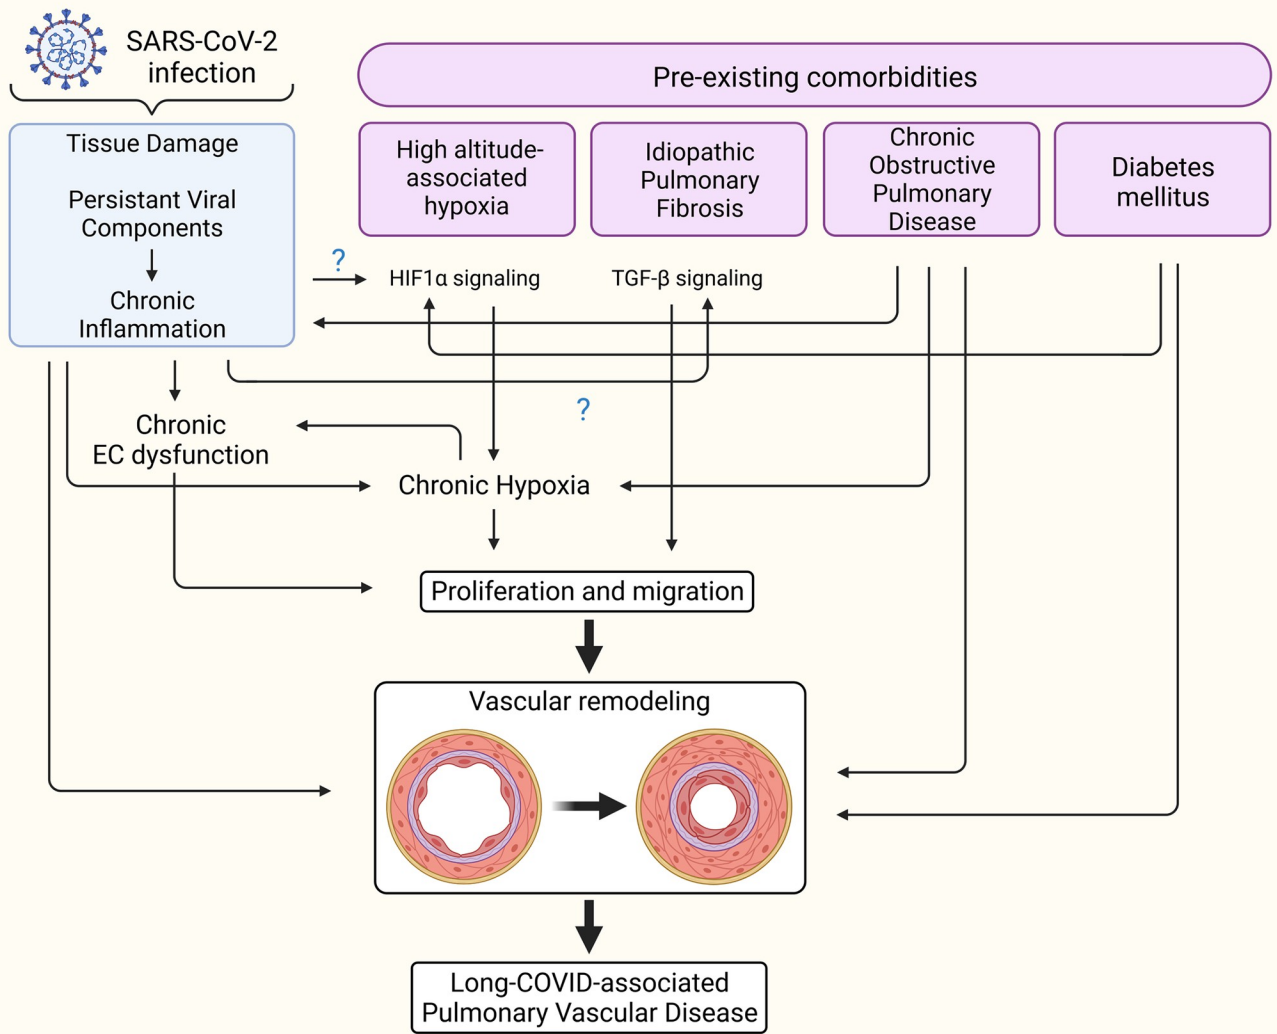

**Fig 2. Comorbidities that may synergize with COVID-19 to predispose risks to PH.** The possible interactions between long COVID state and preexisting comorbidities that may contribute to pulmonary vascular remodeling and the development of PH. Created with [BioRender.com](https://BioRender.com). COVID-19, Coronavirus Disease 2019; HIF1- $\alpha$ , hypoxia-inducible factor 1-alpha; PH, pulmonary hypertension; SARS-CoV-2, Severe Acute Respiratory Syndrome Coronavirus 2; TGF- $\beta$ , transforming growth factor-beta.

<https://doi.org/10.1371/journal.ppat.1011063.g002>

coagulation system and may lead to the prothrombotic state [184–190]. There may be interplay between high-altitude hypoxia and COVID-19 with its “silent hypoxia” and hypercapnia potentially responsible for augmenting the abnormal blood clotting associated with COVID-19. Therefore, one may speculate that high-altitude hypoxia would worsen the altered coagulation process in COVID-19 patients. However, multiple articles suggested that the pathogenesis of the novel coronavirus may be reduced at high altitudes and that people living there may be less susceptible to develop the severe form of COVID-19 [191–193]. Possible relevant reasons for such outcomes could be that a harsh high-altitude environment characterized by low humidity, increased UV radiation, and more ozone is not a favorable milieu for the survival of the virus [191,194]. Secondly, highlanders may possess some adaptations, such as the hypoxia-associated decrease in the expression of ACE-2, which is an entry point for the SARS-CoV-2. However, recent findings that there was a high rate of SARS-CoV-2 seropositivity among the



highlanders in La Rinconada, Peru (the highest city in the world) suggested that there were no protective effects of altitude against the spread of the COVID-19 [195]. One study analyzed the mortality and COVID-19 in high-altitude geographic settlements and found a link between altitude and mortality due to the COVID-19 in males younger than 65 years [196]. More data are needed to support the “theory” that people living at high altitudes are protected against the SARS-CoV-2 [197–199].

**3.2.3. Diabetes mellitus.** Patients with diabetes mellitus (DM) who contract infection with SARS-CoV-2 are at greater risk of developing severe COVID-19 with respiratory failure and in-hospital mortality [200,201]. Not only does COVID-19 put people with DM at-risk for poor prognosis during the acute disease course, but it also may serve as a trigger that accelerates molecular processes that are pathognomonic of vascular diseases, including PH. Patients with DM are already at increased risk of pulmonary emboli and PH due to hypercoagulability and increased frequency of atherosclerotic cardiovascular disease (ASCVD) [202]. This risk is exacerbated by COVID-19, which may mean that the concurrence of DM and acute SARS-CoV-2 infection, when put together, are major risks for the development of chronic thromboembolic pulmonary hypertension (CTEPH). Additionally, patients with both DM and PAH have lower 5-year survival rates compared with PAH patients without DM, indicating that diabetes contributes to PAH pathophysiology and risk of mortality [203]. We hypothesize that acute COVID-19, especially in severe cases, may instigate clotting and pulmonary vascular remodeling, which would predispose these patients to PH over time.

Despite sharing common pathways with PH pathophysiology and the apparent involvement of DM in PAH prognosis, diabetes by itself is not currently considered a direct etiology of PH. Nonetheless, endothelial dysfunction is a known complication of DM as exemplified by common adverse manifestations of DM including diabetic neuropathy, nephropathy, retinopathy, and slow healing wounds or ulcers [204,205]. Patients with DM have abnormal responses to hypoxia due to decreased baseline activity of hypoxia-inducible factor 1-alpha (HIF1- $\alpha$ ), especially in those with poor glycemic control [206,207]. Normally, HIF1- $\alpha$  is important for tissue repair following ischemic vascular injury because it induces expression of growth factors, cytokines, and other chemoattractants important for recruiting endothelial progenitor cells (EPCs) to home within ischemic vascular tissue and maintain endothelial integrity [206,208]. In diabetic patients, this pathway of tissue repair is dysfunctional. As a result, diabetic patients with respiratory failure secondary to COVID-19 may be at risk for prolonged endothelial barrier dysfunction in pulmonary arteries due to lack of vessel tissue repair and consequently vascular remodeling.

Patients with DM may also have elevated activity of pathways that are also involved in PH pathophysiology. For instance, protein kinase C (PKC) expression is up-regulated in the vascular tissue of large arteries, renal glomeruli, and retina in DM, and its isoforms are shown to be involved in vascular complications of DM [205]. PKC is a regulator of smooth muscle contraction within the tunica media of arteries and can be induced by endothelin-1 (ET-1), which is also implicated in diabetic vascular complications [205,209]. Both PKC and ET-1 contribute to PH pathophysiology by inducing vasoconstriction within pulmonary arteries and thereby increase pulmonary vascular resistance and pressure. In fact, endothelin receptor antagonists are indicated as therapeutic agents for patients with Group 1 PH, or PAH, to antagonize continual vasoconstriction by these dysregulated pathways in PAH [209,210]. The PKC and ET-1 pathways may contribute to the risk of PH in DM who had COVID-19 due to the vasoconstriction caused by these molecules.

Lastly, diabetic patients are at increased risk of developing atherosclerosis due to increased levels of circulating lipids. COVID-19 may accelerate the formation of fibrotic atheromas and plaques within the pulmonary vasculature in predisposed patients, especially in patients with DM who are at increased risk of unresolved endothelial damage. If these plaques were to form

in pulmonary vessels and occlude arteries to the point of hemodynamic significance, then this would increase mean pulmonary arterial pressure, pulmonary vascular resistance, and right ventricular afterload, the hallmarks of PH. Furthermore, COVID-19 induces a hypercoagulable state that also increases a person's risk of clotting [131]. Atherosclerotic plaques increase the risk of these clots persisting long after acute COVID-19 and consequently may lead to long-term occlusion of pulmonary arteries consistent with CTEPH. Collectively, the processes described thus far may compound together in individuals with DM following acute COVID-19 and further increase the risk of development and progression of PH because of prolonged impaired vascular remodeling, unresolved clotting, and occlusion of pulmonary arteries.

### 3.3. COVID-19 in people living with HIV

COVID-19 in people living with HIV is linked to high risk of death by compared to people without HIV [211–213]. Other studies showed that persistent symptoms of post-acute sequelae of SARS-CoV-2 infection are more prevalent among HIV-infected individuals [214,215]. HIV causes chronic infection primarily in CD4+ T cells and is a definite cause of PAH [164,216]. Persistent SARS-CoV-2 infection, in theory, elicits chronic inflammation that may augment the endothelial dysfunction and vascular remodeling in people living with HIV-1 who are already predisposed to PH. Further, innate immune dysregulation does not just pose concerns for persistent SARS-CoV-2 infection and long COVID, but also reactivation of latent infections. A previous study conducted at the Gugulethu Community Health Centre Antiretroviral clinic in South Africa demonstrated that prior SARS-CoV-2 infection imposed a higher risk of impaired HIV viral control as measured by HIV viral load [217]. A duration for how long after SARS-CoV-2 infection this impaired HIV viral control might persist is not clear, but in conjunction with innate immune dysregulation, it's possible that SARS-CoV-2 infection might allow for HIV provirus to be reactivated and replicate, increasing the risk for developing HIV-PAH initiated by HIV viral protein-mediated pulmonary vascular remodeling (Fig 3).

Reactivation of HIV provirus allows for the expression of HIV proteins, such as HIV-Tat, -Nef, and -gp120. All three of these proteins are shown to cause endothelial dysfunction and apoptosis, initiating vascular remodeling [152,218,219]. It was also previously shown that Tat and gp120 can induce production of ROS and expression of platelet-derived growth factor (PDGF), which contribute to endothelial dysfunction and are involved in the pulmonary vascular remodeling seen in HIV-associated PAH [220]. A similar increase in apoptosis is seen in endothelial cells exposed to Spike protein [221] and circulating EVs from COVID-19 patients as mentioned above [46]. In HIV-associated PAH, the viral protein products Tat, Nef, and gp120 have been shown to reduce BMPR2 expression [152]. It's possible that these viral proteins contribute to BMPR2 suppression and endothelial injury upon reactivation of provirus in COVID-19 infection or in synergy with Spike protein that was recently reported to persist in circulation of individuals with long COVID [96] (Fig 4). Like many viruses including SARS-CoV-2, HIV is capable of exhausting and suppressing T cell response to infection [222]. While it is clear that a monocyte-macrophage-driven Th1 response is activated early on in response to SARS-CoV-2 [46,223,224], patients who become critically ill mount an aggressive Th2 response as the Th1 response weakens [225]. HIV is known to dysregulate chemokine and cytokine cascades by skewing the Th1-Th2 balance in favor of a Th2 immune response to evade immune detection [226], a process that favors the development of PAH [227]. It remains to be seen whether coinfection with HIV and SARS-CoV-2 has a synergistic effect on immune dysfunction and clinical outcomes. Besides, preexisting chronic HIV infection can be speculated for prolonged inflammation in COVID-19-recovered patients. The inflammation status can be translated into hyperinflammation phase by coinfections.

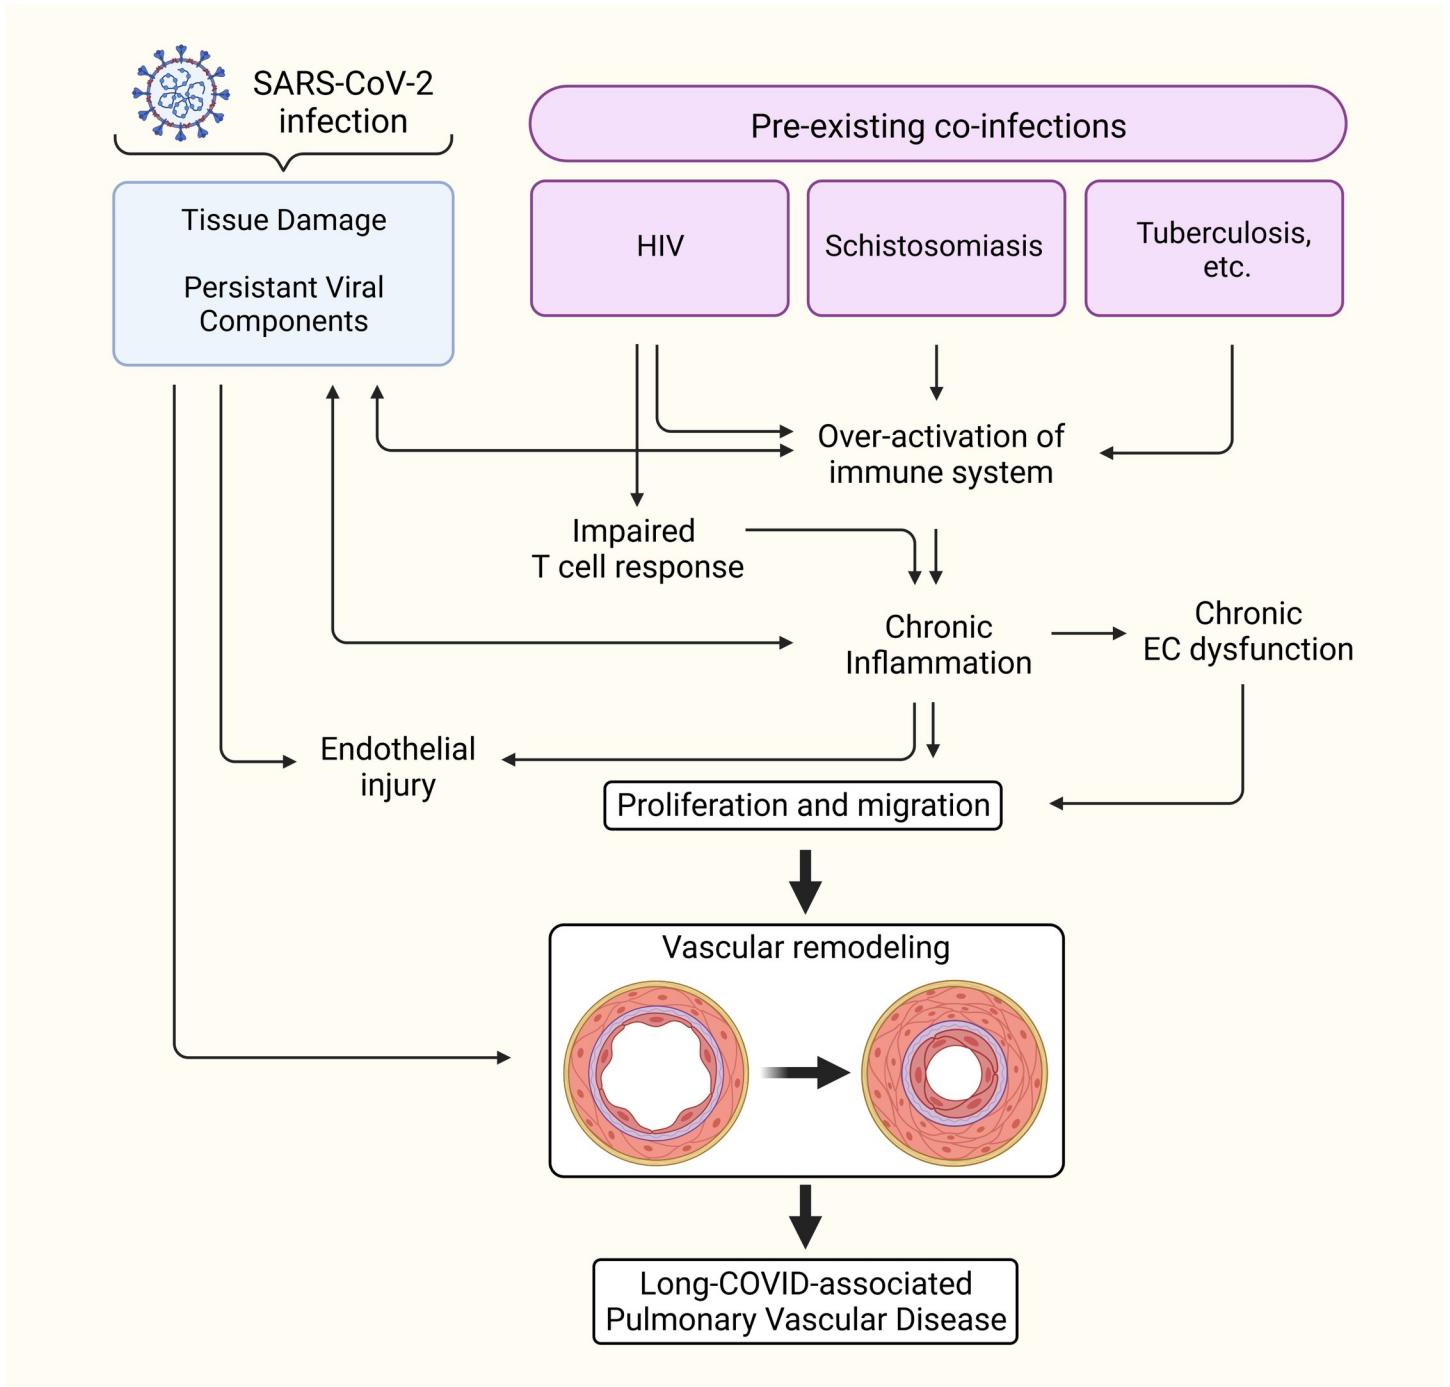

**Fig 3. Coinfections that may synergize with COVID-19 to predispose risks to PH.** Preexisting chronic infections can be speculated for their contribution to prolonged inflammation in long COVID state. Created with [BioRender.com](https://BioRender.com). COVID-19, Coronavirus Disease 2019; PH, pulmonary hypertension; SARS-CoV-2, Severe Acute Respiratory Syndrome Coronavirus 2.

<https://doi.org/10.1371/journal.ppat.1011063.g003>

### 3.4. COVID-19 in people living with schistosomiasis

Schistosomiasis is a parasitic infection that affects >200 million people and is a major cause of PAH worldwide. Currently, there are limited data and information about the potential impact of preexisting parasitic infections on risk of developing COVID-19 illness, and disease severity

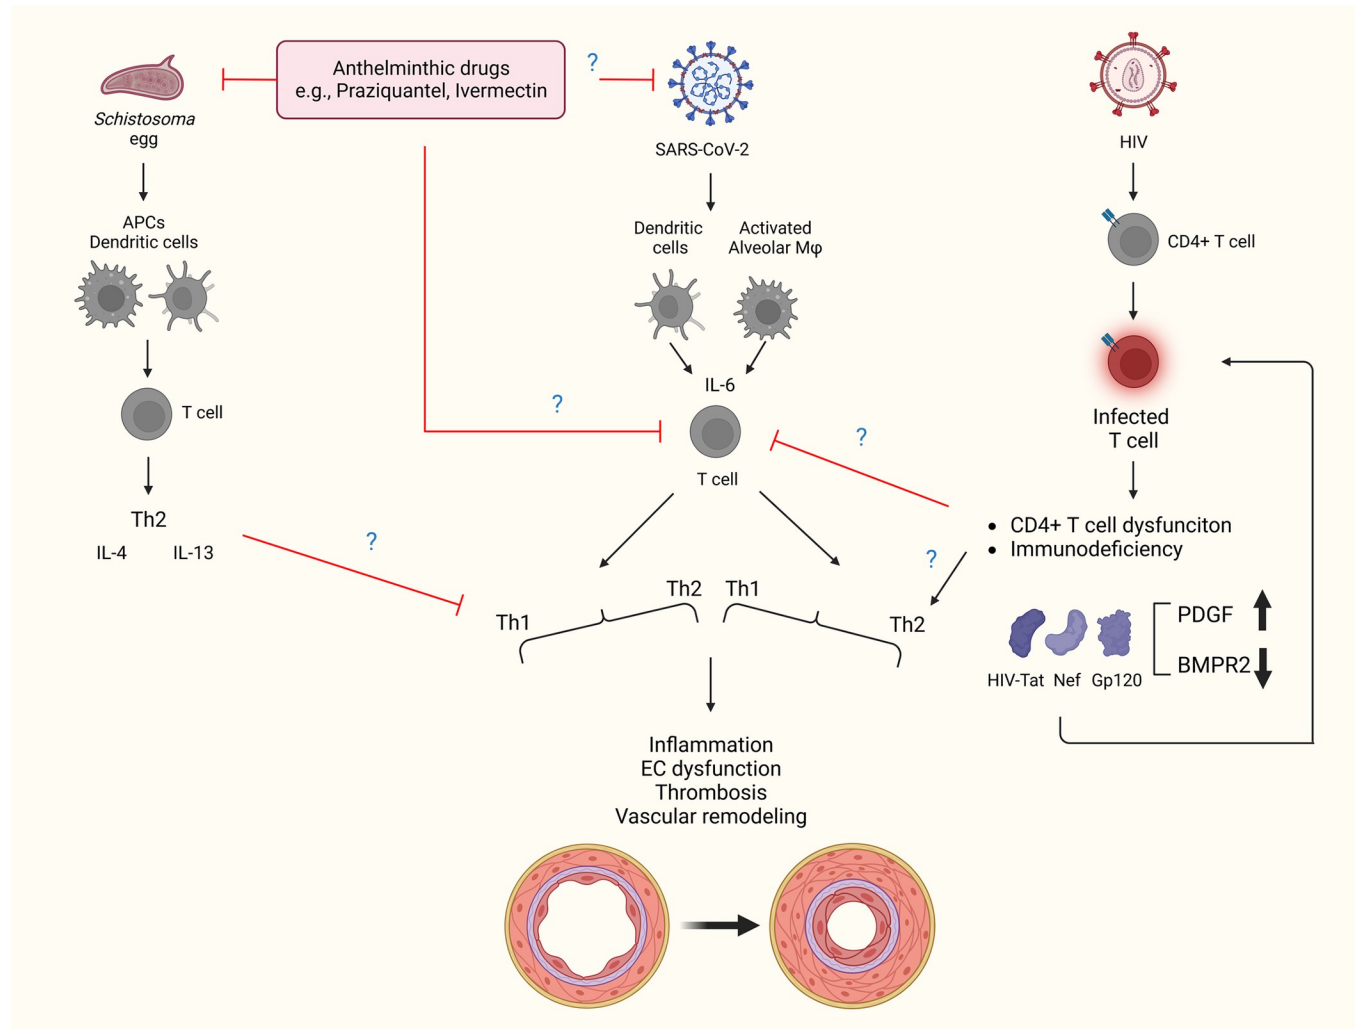

**Fig 4. The schematic shows the activation of immune cells and cytokines triggered following *Schistosoma*, HIV, and SARS-CoV-2 infection.** *Schistosoma* antigen is presented to dendritic cells that activates CD4 T cells to release proinflammatory IL-4 and IL-13 [129,252]. On the other hand, SARS-CoV-2 antigen is processed by dendritic and alveolar macrophages with the release of IL-6 cytokine that eventually favors Th1-induced cytokine storms [253,254]. *Schistosoma* or SARS-CoV-2 infection results into releases of Ly6c monocytes from the bone marrow compartment that drives inflammatory process [255,256]. Of note, coinfection with both *Schistosoma* and SARS-CoV-2 might lead to higher severe conditions. However, based on the recent report on less prevalence of COVID-19 in *Schistosoma*-endemic regions, there is a possibility that anthelmintic drugs such as praziquantel might have antiviral property to block the replication of SARS-CoV-2 or dampen the accumulation and production of IL-6, although this was not observed clinically for ivermectin [257,258]. Blockade of IL-6 might be helpful in mitigating cytokine storm and endothelial damage. The other possibility could be the counterbalancing of Th1-induced cytokine storm by the predominance of Th2 immunity due to prior *Schistosoma* infection. The overall effect of *Schistosoma* and SARS-CoV-2 coinfection on downstream pathological features such as endothelial (EC) dysfunction. HIV proteins are known to cause endothelial dysfunction and vascular remodeling [152,218,219] via skewing the Th1-Th2 balance. HIV viral proteins Tat, Nef, and gp-120 were reported to reduce BMPR2 expressions, while Tat and gp120 can induce expression of PDGF and involving in pulmonary vascular remodeling. Further detailed studies are required to answer whether preexisting chronic HIV infection is associated with prolonged inflammation in long COVID phase. Created with BioRender.com. BMPR2, bone morphogenetic protein receptor type 2; COVID-19, Coronavirus Disease 2019; IL, interleukin; PDGF, platelet-derived growth factor; SARS-CoV-2, Severe Acute Respiratory Syndrome Coronavirus 2.

<https://doi.org/10.1371/journal.ppat.1011063.g004>

and long-term sequelae after becoming infected. Parasitic infections result in type 2 inflammation by the host immune system, characterized by cell populations including Th2 CD4 T cells, eosinophils and basophils, and cytokines such as IL-4, IL-5, and IL-13. In patients with chronic parasitic diseases such as schistosomiasis resulting in longstanding inflammation, these infections establish baseline type 2 immunity in the host. However, a robust type 1 host immune response is important to successfully suppress viral infections. Thus, a hypothesis is that

patients with chronic parasitic infections will be relatively susceptible to infection by SARS-CoV-2. Consistent with this hypothesis are reports from African countries of a higher percentage of COVID-19 confirmed and active cases in schistosomiasis-endemic regions compared to nonendemic regions [228].

An alternative but not necessarily mutually exclusive hypothesis is that patients with chronic parasitic infections may be relatively protected from severe disease once having developed the initial infection. It is thought that a major mechanism of tissue injury in severe SARS-CoV-2 infection is excessive type 1 inflammation; a shift in the inflammatory “setpoint” prior to injury could thus decrease subsequent COVID-19 disease severity [21,229]. Further, Th2 cytokines down-regulate ACE2 expression, which could abrogate viral replication [230,231]. Consistent with this hypothesis, a group reported an inverse correlation between the number of COVID-19 cases and, in particular, the number of deaths in areas of endemic parasitic infections [232]. On a global scale, Africa (where many parasitic infections are endemic) contributes 0.88% cases and only 0.45% of total global deaths (despite having approximately 17% of the world’s population) [232]. In contrast, regions with lower prevalence of parasitic infections such as North America, Europe, and Asia accounted for the vast majority of COVID-19 cases and deaths [233]. A key limitation of these data is differences in testing and reporting from different parts of the world.

The antihelminthics praziquantel or ivermectin could also independently decrease Th1 inflammation. There may also be interindividual genetic variability in driving COVID-19-related severity among the populations of endemic and nonendemic regions, and SARS-CoV-2 itself may have different genotypes and phenotypes between regions or the world. There may also be mediators through different components of the immune system: for example, the complement system that bridges innate and adaptive immunity, and has been shown to be activated in both *Schistosoma* and COVID-19 infections, and thus may be another point of interaction. In addition, a large fraction of COVID-19 patients showed autoantibodies to multiple self-antigens, and these autoantibodies were correlated with the severity of the disease [234]. The presence of pathogenic autoantibodies had also been reported following *Schistosoma* infection [235]. Therefore, the cross-talk between these autoantibodies under the coexisting condition of schistosomiasis and COVID-19 would be another area to consider. Of note, a schematic has been presented (Fig 4) to simplify the possible hypothesis to explain the mechanism by which prior *Schistosoma* infection or use of anthelmintic drugs might attenuate the severity of SARS-CoV-2 in schistosomiasis-endemic regions. These hypotheses need to be tested and verified using animal models [236]. It should be noted that ivermectin was studied as an antiviral in multiple clinical trials of SARS-CoV-2-infected patients [237–239] and was uniformly found to not change acute outcomes such as progression to more severe disease. It is unlikely that many of the patients in these series were concurrently parasite infected as this was not a selection criterion (or prevalence assessed), so the effect of antihelminthics on Th1 versus Th2 bias in virus and parasite coinfecting individuals has not yet been tested.

Overall, evaluation of these possibilities will depend on further epidemiological and demographic data on the coexistence of coinfections and COVID-19. Although studies are limited, more comprehensive research on coinfections with SARS-CoV-2 will help us to understand the role of comorbidities and coinfections on the development of chronic inflammation in post-COVID and inflammation outcomes that induce long COVID-associated PVD.

#### 4. Future perspectives and conclusions

Overall, it appears highly likely that SARS-CoV-2 infection causes some degree of acute PVD as a major aspect of the acute pathology and that some pulmonary vascular injury is likely to



be present in individuals with persistent symptoms, which has pathobiological aspects similar to PH. The interaction with preexisting PH or preexisting comorbidities and if this PVD slowly ameliorates or recurs late is yet to be determined. Further, the evaluation of the interactions between COVID-19 and other infections in the development of long-term PVD is warranted.

SARS-CoV-2 infects type II pneumocytes via ACE2 receptor-mediated endocytosis in the lower respiratory tract, damaging alveolar epithelial cells that are responsible for producing surfactant to maintain alveolar integrity and pulmonary compliance [240]. Infecting these cells induces an intense innate immune response that compromises alveolar epithelial integrity and increases capillary permeability, resulting in localized endothelial damage [241]. Increased capillary permeability may decrease perfusion and cause endothelial damage, which increases the risk for unresolved clots, a major risk factor for developing chronic PH. All these processes contribute to hypoxia in the pulmonary vasculature, which can also cause PH.

One component of the prolonged pathology following acute SARS-CoV-2 infection may be a persistently injured pulmonary vasculature. Viral antigens may also remain, which drives a chronic inflammation. Identification of the key factors that impairs monocyte and T cell-mediated immunity may uncover mechanisms leading to long COVID since the persistence presence of Spike S1 in nonclassical monocytes [142] and elevated CD8 T cell responses were found in PASC individuals [242]. It is also unclear if treating COVID-19 acutely such as with remdesivir or modulating the immune system in acute disease such as with dexamethasone causes a decrease in the prevalence of long-term symptoms. The clinical studies to date studying immunomodulation in COVID-19 have used short-term endpoints such as progression to more severe disease, or mortality or ventilator-free days out of the first 28. These studies have not investigated late endpoints such as the persistence or delayed development of PH years following acute illness. It is reasonable to assume that if PH were to persist or develop late after acute COVID-19, the prevalence would be higher in those with more severe disease at the peak of their illness. Thus, the clinical benefit observed of therapies in preventing progression to more severe disease may also be avoiding the late, postinfectious complication of PH. Also, acute PH or PH that persist for initial few months as reported recently [125] may not resolve in individuals with coinfections or comorbidities with underlying chronic inflammation and/or subclinical cardiopulmonary diseases.

An additional issue is whether drugs currently used in the treatment of PH and lung fibrosis can benefit patients with PVD associated to long COVID-19. Phosphodiesterase 5 inhibitors, endothelin-1 receptor antagonists, soluble guanylyl cyclase stimulators, prostacyclin analogues, and antifibrotic drugs (pirfenidone and nintedanib) are potentially useful for long COVID-19 patients, but only small and inconclusive clinical trials have been conducted so far [243,244].

The recent progress in the COVID-19-related transgenic animal models [236,245] might be useful in some extent to understand if SARS-CoV2 infection worsens the course or development of experimental PH. For example, we may infect transgenic animals with SARS-CoV2 before or after exposing these to the well-established stimuli of PH such as hypoxia [246], monocrotaline [247], or SUGEN/hypoxia [248] to see if this virus exposure exacerbates the PH-related pathologies.

Another potential method for studying inflammation-mediated alterations in the pulmonary vasculature is vascular organoid models. Blood vessel organoid systems contain endothelial cells and pericytes and can be useful to investigate the drivers of vascular injury due to COVID-19 inflammation [249]. Comparing patient-derived vascular organoid models from patients with long COVID specifically might enable to unravel inflammation-mediated dynamics, which regulates pulmonary vascular remodeling. Additionally, human capillary

organoids [249], vascular lung cocultures [250], and pulmonary artery-on-a-chip models [251] can be further adapted to long COVID concept, in order to elucidate the route of inflammation-mediated pulmonary vascular remodeling.

## References

1. Taquet M, Dercon Q, Luciano S, Geddes JR, Husain M, Harrison PJ. Incidence, co-occurrence, and evolution of long-COVID features: A 6-month retrospective cohort study of 273,618 survivors of COVID-19. *PLoS Med.* 2021; 18:e1003773. <https://doi.org/10.1371/journal.pmed.1003773> PMID: 34582441
2. Mattiuzzi C, Henry BM, Sanchis-Gomar F, Lippi G. SARS-CoV-2 recurrent RNA positivity after recovering from coronavirus disease 2019 (COVID-19): a meta-analysis. *Acta Biomed.* 2020; 91:e2020014. <https://doi.org/10.23750/abm.v91i3.10303> PMID: 32921710
3. Liu F, Cai Z-B, Huang J-S, Yu W-Y, Niu H-Y, Zhang Y, et al. Positive SARS-CoV-2 RNA recurs repeatedly in a case recovered from COVID-19: dynamic results from 108 days of follow-up. *Pathog Dis.* 2020; 78:ftaa031. <https://doi.org/10.1093/femspd/ftaa031> PMID: 32592396
4. Dominguez-Villar M, Hafler DA. Regulatory T cells in autoimmune disease. *Nat Immunol.* 2018; 19:665–673. <https://doi.org/10.1038/s41590-018-0120-4> PMID: 29925983
5. Dejaco C, Duftner C, Grubeck-Loebenstien B, Schirmer M. Imbalance of regulatory T cells in human autoimmune diseases. *Immunology.* 2006; 117:289–300. <https://doi.org/10.1111/j.1365-2567.2005.02317.x> PMID: 16476048
6. Cenke E, Badimon L, Bugiardini R, Claeys MJ, De Luca G, de Wit C, et al. Cardiovascular disease and COVID-19: a consensus paper from the ESC Working Group on Coronary Pathophysiology & Microcirculation, ESC Working Group on Thrombosis and the Association for Acute Cardiovascular Care (ACVC), in collaboration with the European Heart Rhythm Association (EHRA). *Cardiovasc Res.* 2021; 117:2705–2729. <https://doi.org/10.1093/cvr/cvab298> PMID: 34528075
7. Guzik TJ, Mohiddin SA, Dimarco A, Patel V, Savvatis K, Marelli-Berg FM, et al. COVID-19 and the cardiovascular system: implications for risk assessment, diagnosis, and treatment options. *Cardiovasc Res.* 2020; 116:1666–1687. <https://doi.org/10.1093/cvr/cvaa106> PMID: 32352535
8. Zou X, Chen K, Zou J, Han P, Hao J, Han Z. Single-cell RNA-seq data analysis on the receptor ACE2 expression reveals the potential risk of different human organs vulnerable to 2019-nCoV infection. *Front Med.* 2020; 14:185–192. <https://doi.org/10.1007/s11684-020-0754-0> PMID: 32170560
9. Barton LM, Duval EJ, Stroberg E, Ghosh S, Mukhopadhyay S. COVID-19 Autopsies, Oklahoma, USA. *Am J Clin Pathol.* 2020; 153:725–733. <https://doi.org/10.1093/ajcp/aqaa062> PMID: 32275742
10. Nicholls J, Dong X-P, Jiang G, Peiris M. SARS: clinical virology and pathogenesis. *Respirol Carlton Vic.* 2003; 8(Suppl):S6–S8. <https://doi.org/10.1046/j.1440-1843.2003.00517.x> PMID: 15018126
11. Tian S, Xiong Y, Liu H, Niu L, Guo J, Liao M, et al. Pathological study of the 2019 novel coronavirus disease (COVID-19) through postmortem core biopsies. *Mod Pathol.* 2020; 33:1007–1014. <https://doi.org/10.1038/s41379-020-0536-x> PMID: 32291399
12. Xu Z, Shi L, Wang Y, Zhang J, Huang L, Zhang C, et al. Pathological findings of COVID-19 associated with acute respiratory distress syndrome. *Lancet Respir Med.* 2020; 8:420–422. [https://doi.org/10.1016/S2213-2600\(20\)30076-X](https://doi.org/10.1016/S2213-2600(20)30076-X) PMID: 32085846
13. Bonaventura A, Vecchié A, Dagna L, Martinod K, Dixon DL, Van Tassel BW, et al. Endothelial dysfunction and immunothrombosis as key pathogenic mechanisms in COVID-19. *Nat Rev Immunol.* 2021; 21:319–329. <https://doi.org/10.1038/s41577-021-00536-9> PMID: 33824483
14. Klok FA, Kruip MJHA, van der Meer NJM, Arbous MS, Gommers D, Kant KM, et al. Confirmation of the high cumulative incidence of thrombotic complications in critically ill ICU patients with COVID-19: An updated analysis. *Thromb Res.* 2020; 191:148–150. <https://doi.org/10.1016/j.thromres.2020.04.041> PMID: 32381264
15. Zhou F, Yu T, Du R, Fan G, Liu Y, Liu Z, et al. Clinical course and risk factors for mortality of adult inpatients with COVID-19 in Wuhan, China: a retrospective cohort study. *Lancet.* 2020; 395:1054–1062. [https://doi.org/10.1016/S0140-6736\(20\)30566-3](https://doi.org/10.1016/S0140-6736(20)30566-3) PMID: 32171076
16. Ackermann M, Verleden SE, Kuehnel M, Haverich A, Welte T, Laenger F, et al. Pulmonary Vascular Endothelialitis, Thrombosis, and Angiogenesis in Covid-19. *N Engl J Med.* 2020; 383:120–128. <https://doi.org/10.1056/NEJMoa2015432> PMID: 32437596
17. Varga Z, Flammer AJ, Steiger P, Haberecker M, Andermatt R, Zinkernagel AS, et al. Endothelial cell infection and endotheliitis in COVID-19. *Lancet.* 2020; 395:1417–1418. [https://doi.org/10.1016/S0140-6736\(20\)30937-5](https://doi.org/10.1016/S0140-6736(20)30937-5) PMID: 32325026

18. Merad M, Martin JC. Pathological inflammation in patients with COVID-19: a key role for monocytes and macrophages. *Nat Rev Immunol*. 2020;1–8. <https://doi.org/10.1038/s41577-020-0331-4> PMID: 32376901
19. Panigada M, Bottino N, Tagliabue P, Grasselli G, Novembrino C, Chantarangkul V, et al. Hypercoagulability of COVID-19 patients in intensive care unit: A report of thromboelastography findings and other parameters of hemostasis. *J Thromb Haemost*. 2020; 18:1738–1742. <https://doi.org/10.1111/jth.14850> PMID: 32302438
20. Bikdeli B, Madhavan MV, Jimenez D, Chuich T, Dreyfus I, Driggin E, et al. COVID-19 and Thrombotic or Thromboembolic Disease: Implications for Prevention, Antithrombotic Therapy, and Follow-Up: JACC State-of-the-Art Review. *J Am Coll Cardiol*. 2020; 75:2950–2973. <https://doi.org/10.1016/j.jacc.2020.04.031> PMID: 32311448
21. Huang C, Wang Y, Li X, Ren L, Zhao J, Hu Y, et al. Clinical features of patients infected with 2019 novel coronavirus in Wuhan, China. *Lancet*. 2020; 395:497–506. [https://doi.org/10.1016/S0140-6736\(20\)30183-5](https://doi.org/10.1016/S0140-6736(20)30183-5) PMID: 31986264
22. Teuwen L-A, Geldhof V, Pasut A, Carmeliet P. COVID-19: the vasculature unleashed. *Nat Rev Immunol*. 2020; 20:389–391. <https://doi.org/10.1038/s41577-020-0343-0> PMID: 32439870
23. Ferrario CM, Jessup J, Chappell MC, Averill DB, Brosnihan KB, Tallant EA, et al. Effect of angiotensin-converting enzyme inhibition and angiotensin II receptor blockers on cardiac angiotensin-converting enzyme 2. *Circulation*. 2005; 111:2605–2610. <https://doi.org/10.1161/CIRCULATIONAHA.104.510461> PMID: 15897343
24. Kobayashi J, Murata I. Nitric oxide inhalation as an interventional rescue therapy for COVID-19-induced acute respiratory distress syndrome. *Ann Intensive Care*. 2020; 10:61. <https://doi.org/10.1186/s13613-020-00681-9> PMID: 32436029
25. England JT, Abdulla A, Biggs CM, Lee AYY, Hay KA, Hoiland RL, et al. Weathering the COVID-19 storm: Lessons from hematologic cytokine syndromes. *Blood Rev*. 2020:100707. <https://doi.org/10.1016/j.blre.2020.100707> PMID: 32425294
26. Magro C, Mulvey JJ, Berlin D, Nuovo G, Salvatore S, Harp J, et al. Complement associated microvascular injury and thrombosis in the pathogenesis of severe COVID-19 infection: A report of five cases. *Transl Res*. 2020; 220:1–13. <https://doi.org/10.1016/j.trsl.2020.04.007> PMID: 32299776
27. Poissy J, Goutay J, Caplan M, Parmentier E, Duburcq T, Lassalle F, et al. Pulmonary Embolism in Patients With COVID-19: Awareness of an Increased Prevalence. *Circulation*. 2020; 142:184–186. <https://doi.org/10.1161/CIRCULATIONAHA.120.047430> PMID: 32330083
28. Liao M, Liu Y, Yuan J, Wen Y, Xu G, Zhao J, et al. Single-cell landscape of bronchoalveolar immune cells in patients with COVID-19. *Nat Med*. 2020; 26:842–844. <https://doi.org/10.1038/s41591-020-0901-9> PMID: 32398875
29. Lv J, Wang Z, Qu Y, Zhu H, Zhu Q, Tong W, et al. Distinct uptake, amplification, and release of SARS-CoV-2 by M1 and M2 alveolar macrophages. *Cell Discov*. 2021; 7:24. <https://doi.org/10.1038/s41421-021-00258-1> PMID: 33850112
30. Guo C, Li B, Ma H, Wang X, Cai P, Yu Q, et al. Single-cell analysis of two severe COVID-19 patients reveals a monocyte-associated and tocilizumab-responding cytokine storm. *Nat Commun*. 2020; 11:3924. <https://doi.org/10.1038/s41467-020-17834-w> PMID: 32764665
31. Zhou Y, Fu B, Zheng X, Wang D, Zhao C, Qi Y, et al. Pathogenic T-cells and inflammatory monocytes incite inflammatory storms in severe COVID-19 patients. *Natl Sci Rev*. 2020; 7:998–1002. <https://doi.org/10.1093/nsr/nwaa041> PMID: 34676125
32. Tan L, Wang Q, Zhang D, Ding J, Huang Q, Tang Y-Q, et al. Lymphopenia predicts disease severity of COVID-19: a descriptive and predictive study. *Signal Transduct Target Ther*. 2020; 5:33. <https://doi.org/10.1038/s41392-020-0148-4> PMID: 32296069
33. Zhang G, Hu C, Luo L, Fang F, Chen Y, Li J, et al. Clinical features and short-term outcomes of 221 patients with COVID-19 in Wuhan, China. *J Clin Virol*. 2020; 127:104364. <https://doi.org/10.1016/j.jcv.2020.104364> PMID: 32311650
34. Liu R, Wang Y, Li J, Han H, Xia Z, Liu F, et al. Decreased T cell populations contribute to the increased severity of COVID-19. *Clin Chim Acta*. 2020; 508:110–114. <https://doi.org/10.1016/j.cca.2020.05.019> PMID: 32405080
35. Jiang M, Guo Y, Luo Q, Huang Z, Zhao R, Liu S, et al. T-Cell Subset Counts in Peripheral Blood Can Be Used as Discriminatory Biomarkers for Diagnosis and Severity Prediction of Coronavirus Disease 2019. *J Infect Dis*. 2020; 222:198–202. <https://doi.org/10.1093/infdis/jiaa252> PMID: 32379887
36. Liu Z, Long W, Tu M, Chen S, Huang Y, Wang S, et al. Lymphocyte subset (CD4+, CD8+) counts reflect the severity of infection and predict the clinical outcomes in patients with COVID-19. *J Infect*. 2020; 81:318–356. <https://doi.org/10.1016/j.jinf.2020.03.054> PMID: 32283159

37. Hadjadj J, Yatim N, Barnabei L, Corneau A, Boussier J, Smith N, et al. Impaired type I interferon activity and inflammatory responses in severe COVID-19 patients. *Science*. 2020; 369:718–724. <https://doi.org/10.1126/science.abc6027> PMID: 32661059
38. Galani I-E, Rovina N, Lampropoulou V, Triantafyllia V, Manioudaki M, Pavlos E, et al. Untuned antiviral immunity in COVID-19 revealed by temporal type I/III interferon patterns and flu comparison. *Nat Immunol*. 2021; 22:32–40. <https://doi.org/10.1038/s41590-020-00840-x> PMID: 33277638
39. Yang J, Zhong M, Hong K, Yang Q, Zhang E, Zhou D, et al. Characteristics of T-cell responses in COVID-19 patients with prolonged SARS-CoV-2 positivity—a cohort study. *Clin Transl Immunol*. 2021; 10:e1259. <https://doi.org/10.1002/cti2.1259> PMID: 33728049
40. Wang S, Fu L, Huang K, Han J, Zhang R, Fu Z. Neutrophil-to-lymphocyte ratio on admission is an independent risk factor for the severity and mortality in patients with coronavirus disease 2019. *J Infect*. 2021; 82:e16–e18. <https://doi.org/10.1016/j.jinf.2020.09.022> PMID: 32979408
41. Middleton EA, He X-Y, Denorme F, Campbell RA, Ng D, Salvatore SP, et al. Neutrophil extracellular traps contribute to immunothrombosis in COVID-19 acute respiratory distress syndrome. *Blood*. 2020; 136:1169–1179. <https://doi.org/10.1182/blood.2020007008> PMID: 32597954
42. Nicolai L, Leunig A, Brambs S, Kaiser R, Weinberger T, Weigand M, et al. Immunothrombotic Dysregulation in COVID-19 Pneumonia Is Associated With Respiratory Failure and Coagulopathy. *Circulation*. 2020; 142:1176–1189. <https://doi.org/10.1161/CIRCULATIONAHA.120.048488> PMID: 32755393
43. Zuo Y, Yalavarthi S, Shi H, Gockman K, Zuo M, Madison JA, et al. Neutrophil extracellular traps in COVID-19. *JCI Insight*. 2020; 5:138999. <https://doi.org/10.1172/jci.insight.138999> PMID: 32329756
44. Delgado-Rizo V, Martínez-Guzmán MA, Iñiguez-Gutiérrez L, García-Orozco A, Alvarado-Navarro A, Fafutis-Morris M. Neutrophil Extracellular Traps and Its Implications in Inflammation: An Overview. *Front Immunol*. 2017; 8. <https://doi.org/10.3389/fimmu.2017.00081> PMID: 28220120
45. Andaloussi EL S, Mäger I, Breakefield XO, Wood MJA. Extracellular vesicles: biology and emerging therapeutic opportunities. *Nat Rev Drug Discov*. 2013; 12:347–357. <https://doi.org/10.1038/nrd3978> PMID: 23584393
46. Krishnamachary B, Cook C, Kumar A, Spikes L, Chalise P, Dhillon NK. Extracellular vesicle-mediated endothelial apoptosis and EV-associated proteins correlate with COVID-19 disease severity. *J Extracell Vesicles*. 2021; 10:e12117. <https://doi.org/10.1002/jev2.12117> PMID: 34262673
47. Imai Y, Kuba K, Rao S, Huan Y, Guo F, Guan B, et al. Angiotensin-converting enzyme 2 protects from severe acute lung failure. *Nature*. 2005; 436:112–116. <https://doi.org/10.1038/nature03712> PMID: 16001071
48. Ferrario CM, Trask AJ, Jessup JA. Advances in biochemical and functional roles of angiotensin-converting enzyme 2 and angiotensin-(1–7) in regulation of cardiovascular function. *Am J Physiol Heart Circ Physiol*. 2005; 289:H2281–H2290. <https://doi.org/10.1152/ajpheart.00618.2005> PMID: 16055515
49. Sodhi CP, Wohlford-Lenane C, Yamaguchi Y, Prindle T, Fulton WB, Wang S, et al. Attenuation of pulmonary ACE2 activity impairs inactivation of des-Arg9 bradykinin/BKB1R axis and facilitates LPS-induced neutrophil infiltration. *Am J Physiol Lung Cell Mol Physiol*. 2018; 314:L17–L31. <https://doi.org/10.1152/ajplung.00498.2016> PMID: 28935640
50. Glowacka I, Bertram S, Herzog P, Pfefferle S, Steffen I, Muench MO, et al. Differential downregulation of ACE2 by the spike proteins of severe acute respiratory syndrome coronavirus and human coronavirus NL63. *J Virol*. 2010; 84:1198–1205. <https://doi.org/10.1128/JVI.01248-09> PMID: 19864379
51. Pedrosa MA, Valenzuela R, Garrido-Gil P, Labandeira CM, Navarro G, Franco R, et al. Experimental data using candesartan and captopril indicate no double-edged sword effect in COVID-19. *Clin Sci (Lond)*. 1979; 2021(135):465–481. <https://doi.org/10.1042/CS20201511> PMID: 33479758
52. Rodriguez-Perez AI, Labandeira CM, Pedrosa MA, Valenzuela R, Suarez-Quintanilla JA, Cortes-Ayaso M, et al. Autoantibodies against ACE2 and angiotensin type-1 receptors increase severity of COVID-19. *J Autoimmun*. 2021; 122:102683. <https://doi.org/10.1016/j.jaut.2021.102683> PMID: 34144328
53. Rosas IO, Bräu N, Waters M, Go RC, Hunter BD, Bhagani S, et al. Tocilizumab in Hospitalized Patients with Severe Covid-19 Pneumonia. *N Engl J Med*. 2021; 384:1503–1516. <https://doi.org/10.1056/NEJMoa2028700> PMID: 33631066
54. RECOVERY Collaborative Group. Tocilizumab in patients admitted to hospital with COVID-19 (RECOVERY): a randomised, controlled, open-label, platform trial. *Lancet*. 2021; 397:1637–1645. [https://doi.org/10.1016/S0140-6736\(21\)00676-0](https://doi.org/10.1016/S0140-6736(21)00676-0) PMID: 33933206
55. Kalil AC, Patterson TF, Mehta AK, Tomashek KM, Wolfe CR, Ghazaryan V, et al. Baricitinib plus Remdesivir for Hospitalized Adults with Covid-19. *N Engl J Med*. 2021; 384:795–807. <https://doi.org/10.1056/NEJMoa2031994> PMID: 33306283

56. RECOVERY Collaborative Group, Horby P, Lim WS, Emberson JR, Mafham M, Bell JL, et al. Dexamethasone in Hospitalized Patients with Covid-19. *N Engl J Med*. 2021; 384:693–704. <https://doi.org/10.1056/NEJMoa2021436> PMID: 32678530
57. Klok FA, MJHA, van der Meer NJM, Arbous MS, Gommers D, et al. Incidence of thrombotic complications in critically ill ICU patients with COVID-19. *Thromb Res*. 2020; 191:145–147. <https://doi.org/10.1016/j.thromres.2020.04.013> PMID: 32291094
58. Ji H-L, Zhao R, Matalon S, Matthay MA. Elevated Plasmin (ogen) as a Common Risk Factor for COVID-19 Susceptibility. *Physiol Rev*. 2020; 100:1065–1075. <https://doi.org/10.1152/physrev.00013.2020> PMID: 32216698
59. Kumar DR, Hanlin E, Glurich I, Mazza JJ, Yale SH. Virchow's contribution to the understanding of thrombosis and cellular biology. *Clin Med Res*. 2010; 8:168–172. <https://doi.org/10.3121/cmr.2009.866> PMID: 20739582
60. Mclachlin AD, Mclachlin JA, Jory TA, Rawling EG. Venous stasis in the lower extremities. *Ann Surg*. 1960; 152:678–685. <https://doi.org/10.1097/00000658-196010000-00011> PMID: 13774059
61. Welsh JD, Hoofnagle MH, Bamezai S, Oxendine M, Lim L, Hall JD, et al. Hemodynamic regulation of perivalvular endothelial gene expression prevents deep venous thrombosis. *J Clin Invest*. 2019; 129:5489–5500. <https://doi.org/10.1172/JCI124791> PMID: 31710307
62. Bandyopadhyay D, Akhtar T, Hajra A, Gupta M, Das A, Chakraborty S, et al. COVID-19 Pandemic: Cardiovascular Complications and Future Implications. *Am J Cardiovasc Drugs*. 2020; 20:311–324. <https://doi.org/10.1007/s40256-020-00420-2> PMID: 32578167
63. Kakihana Y, Ito T, Nakahara M, Yamaguchi K, Yasuda T. Sepsis-induced myocardial dysfunction: pathophysiology and management. *J Intensive Care*. 2016; 4:22. <https://doi.org/10.1186/s40560-016-0148-1> PMID: 27011791
64. Middeldorp S, Coppens M, van Haaps TF, Foppen M, Vlaar AP, Müller MCA, et al. Incidence of venous thromboembolism in hospitalized patients with COVID-19. *J Thromb Haemost*. 2020; 18:1995–2002. <https://doi.org/10.1111/jth.14888> PMID: 32369666
65. Artifoni M, Danic G, Gautier G, Gicquel P, Boutoille D, Raffi F, et al. Systematic assessment of venous thromboembolism in COVID-19 patients receiving thromboprophylaxis: incidence and role of D-dimer as predictive factors. *J Thromb Thrombolysis*. 2020; 50:211–216. <https://doi.org/10.1007/s11239-020-02146-z> PMID: 32451823
66. Lodigiani C, Iapichino G, Carenzo L, Cecconi M, Ferrazzi P, Sebastian T, et al. Venous and arterial thromboembolic complications in COVID-19 patients admitted to an academic hospital in Milan, Italy. *Thromb Res*. 2020; 191:9–14. <https://doi.org/10.1016/j.thromres.2020.04.024> PMID: 32353746
67. Lijnen HR, Collen D. Endothelium in hemostasis and thrombosis. *Prog Cardiovasc Dis*. 1997; 39:343–350. [https://doi.org/10.1016/s0033-0620\(97\)80032-1](https://doi.org/10.1016/s0033-0620(97)80032-1) PMID: 9050819
68. Bombeli T, Karsan A, Tait JF, Harlan JM. Apoptotic vascular endothelial cells become procoagulant. *Blood*. 1997; 89:2429–2442. PMID: 9116287
69. Goshua G, Pine AB, Meizlish ML, Chang C-H, Zhang H, Bahel P, et al. Endotheliopathy in COVID-19-associated coagulopathy: evidence from a single-centre, cross-sectional study. *Lancet Haematol*. 2020; 7:e575–e582. [https://doi.org/10.1016/S2352-3026\(20\)30216-7](https://doi.org/10.1016/S2352-3026(20)30216-7) PMID: 32619411
70. D'Alessandro A, Thomas T, Dzieciatkowska M, Hill RC, Francis RO, Hudson KE, et al. Serum Proteomics in COVID-19 Patients: Altered Coagulation and Complement Status as a Function of IL-6 Level. *J Proteome Res*. 2020; 19:4417–4427. <https://doi.org/10.1021/acs.jproteome.0c00365> PMID: 32786691
71. Martinelli N, Montagnana M, Pizzolo F, Friso S, Salvagno GL, Forni GL, et al. A relative ADAMTS13 deficiency supports the presence of a secondary microangiopathy in COVID 19. *Thromb Res*. 2020; 193:170–172. <https://doi.org/10.1016/j.thromres.2020.07.034> PMID: 32707276
72. Bazzan M, Montaruli B, Sciascia S, Cosseddu D, Norbiato C, Roccatello D. Low ADAMTS 13 plasma levels are predictors of mortality in COVID-19 patients. *Intern Emerg Med*. 2020; 15:861–863. <https://doi.org/10.1007/s11739-020-02394-0> PMID: 32557383
73. Jayarangaiah A, Kariyanna PT, Chen X, Jayarangaiah A, Kumar A. COVID-19-Associated Coagulopathy: An Exacerbated Immunothrombosis Response. *Clin Appl Thromb Hemost*. 2020; 26:1076029620943293. <https://doi.org/10.1177/1076029620943293> PMID: 32735131
74. Del Valle DM, Kim-Schulze S, Huang H-H, Beckmann ND, Nirenberg S, Wang B, et al. An inflammatory cytokine signature predicts COVID-19 severity and survival. *Nat Med*. 2020; 26:1636–1643. <https://doi.org/10.1038/s41591-020-1051-9> PMID: 32839624
75. Manne BK, Denorme F, Middleton EA, Portier I, Rowley JW, Stubben C, et al. Platelet gene expression and function in patients with COVID-19. *Blood*. 2020; 136:1317–1329. <https://doi.org/10.1182/blood.2020007214> PMID: 32573711



76. Czaikoski PG, Mota JM, Nascimento DC, Sônego F, Castanheira FV, Melo PH, et al. Neutrophil Extracellular Traps Induce Organ Damage during Experimental and Clinical Sepsis. *PLoS ONE*. 2016; 11:e0148142. <https://doi.org/10.1371/journal.pone.0148142> PMID: 26849138
77. Hottz ED, Azevedo-Quintanilha IG, Palhinha L, Teixeira L, Barreto EA, Pão CRR, et al. Platelet activation and platelet-monocyte aggregate formation trigger tissue factor expression in patients with severe COVID-19. *Blood*. 2020; 136:1330–1341. <https://doi.org/10.1182/blood.2020007252> PMID: 32678428
78. Zhang S, Liu Y, Wang X, Yang L, Li H, Wang Y, et al. SARS-CoV-2 binds platelet ACE2 to enhance thrombosis in COVID-19. *J Hematol Oncol*. 2020; 13:120. <https://doi.org/10.1186/s13045-020-00954-7> PMID: 32887634
79. The REMAP-CAP ACTIV-4a, and ATTACC Investigators. Therapeutic Anticoagulation with Heparin in Critically Ill Patients with Covid-19. *N Engl J Med*. 2021; 385:777–789. <https://doi.org/10.1056/NEJMoa2103417> PMID: 34351722
80. Spyropoulos AC, Goldin M, Giannis D, Diab W, Wang J, Khanijo S, et al. Efficacy and Safety of Therapeutic-Dose Heparin vs Standard Prophylactic or Intermediate-Dose Heparins for Thromboprophylaxis in High-risk Hospitalized Patients With COVID-19: The HEP-COVID Randomized Clinical Trial. *JAMA Intern Med*. 2021; 181:1612–1620. <https://doi.org/10.1001/jamainternmed.2021.6203> PMID: 34617959
81. The ATTACC ACTIV-4a, and REMAP-CAP Investigators. Therapeutic Anticoagulation with Heparin in Noncritically Ill Patients with Covid-19. *N Engl J Med*. 2021; 385:790–802. <https://doi.org/10.1056/NEJMoa2105911> PMID: 34351721
82. <https://www.covid19treatmentguidelines.nih.gov/tables/therapeutic-management-of-hospitalized-adults/>.
83. Millar FR, Summers C, Griffiths MJ, Toshner MR, Proudfoot AG. The pulmonary endothelium in acute respiratory distress syndrome: insights and therapeutic opportunities. *Thorax*. 2016; 71:462–473. <https://doi.org/10.1136/thoraxjnl-2015-207461> PMID: 26968969
84. Vassiliou AG, Kotanidou A, Dimopoulou I, Orfanos SE. Endothelial Damage in Acute Respiratory Distress Syndrome. *Int J Mol Sci*. 2020; 21:E8793. <https://doi.org/10.3390/ijms21228793> PMID: 33233715
85. Targosz-Korecka M, Kubisiak A, Kloska D, Kopacz A, Grochot-Przeczek A, Szymonski M. Endothelial glycocalyx shields the interaction of SARS-CoV-2 spike protein with ACE2 receptors. *Sci Rep*. 2021; 11:12157. <https://doi.org/10.1038/s41598-021-91231-1> PMID: 34108510
86. Hoffmann M, Kleine-Weber H, Schroeder S, Krüger N, Herrler T, Erichsen S, et al. SARS-CoV-2 Cell Entry Depends on ACE2 and TMPRSS2 and Is Blocked by a Clinically Proven Protease Inhibitor. *Cell*. 2020; 181:271–280.e8. <https://doi.org/10.1016/j.cell.2020.02.052> PMID: 32142651
87. Joffre J, Rodriguez L, Matthay ZA, Lloyd E, Fields AT, Bainton RJ, et al. COVID-19-associated Lung Microvascular Endotheliopathy: A “From the Bench” Perspective. *Am J Respir Crit Care Med*. 2022; 206:961–972. <https://doi.org/10.1164/rccm.202107-1774OC> PMID: 35649173
88. Schimmel L, Chew KY, Stocks CJ, Yordanov TE, Essebier P, Kulasinghe A, et al. Endothelial cells are not productively infected by SARS-CoV-2. *Clin Transl Immunol*. 2021; 10:e1350. <https://doi.org/10.1002/cti2.1350> PMID: 34721846
89. Perico L, Morigi M, Galbusera M, Pezzotta A, Gastoldi S, Imberti B, et al. SARS-CoV-2 Spike Protein 1 Activates Microvascular Endothelial Cells and Complement System Leading to Platelet Aggregation. *Front Immunol*. 2022; 13:827146. <https://doi.org/10.3389/fimmu.2022.827146> PMID: 35320941
90. Zicari S, Arakelyan A, Palomino RAÑ, Fitzgerald W, Vanpouille C, Lebedeva A, et al. Human cytomegalovirus-infected cells release extracellular vesicles that carry viral surface proteins. *Virology*. 2018; 524:97–105. <https://doi.org/10.1016/j.virol.2018.08.008> PMID: 30165311
91. Gould SJ, Booth AM, Hildreth JEK. The Trojan exosome hypothesis. *Proc Natl Acad Sci U S A*. 2003; 100:10592–10597. <https://doi.org/10.1073/pnas.1831413100> PMID: 12947040
92. Chelvanambi S, Bogatcheva NV, Bednorz M, Agarwal S, Maier B, Alves NJ, et al. HIV-Nef Protein Persists in the Lungs of Aviremic Patients with HIV and Induces Endothelial Cell Death. *Am J Respir Cell Mol Biol*. 2019; 60:357–366. <https://doi.org/10.1165/rcmb.2018-0089OC> PMID: 30321057
93. Dogrammatzis C, Saleh S, Deighan C, Kalamvoki M. Diverse Populations of Extracellular Vesicles with Opposite Functions during Herpes Simplex Virus 1 Infection. *J Virol*. 2021; 95:e02357–e02320. <https://doi.org/10.1128/JVI.02357-20> PMID: 33361424
94. Troyer Z, Alhusaini N, Tabler CO, Sweet T, de Carvalho KIL, Schlatter DM, et al. Extracellular vesicles carry SARS-CoV-2 spike protein and serve as decoys for neutralizing antibodies. *J Extracell Vesicles*. 2021; 10:e12112. <https://doi.org/10.1002/jev2.12112> PMID: 34188786

95. Pesce E, Manfrini N, Cordiglieri C, Santi S, Bandera A, Gobbini A, et al. Exosomes Recovered From the Plasma of COVID-19 Patients Expose SARS-CoV-2 Spike-Derived Fragments and Contribute to the Adaptive Immune Response. *Front Immunol*. 2021; 12:785941. <https://doi.org/10.3389/fimmu.2021.785941> PMID: 35111156
96. Craddock V, Mahajan A, Krishnamachary B, Spikes L, Chalise P, Dhillon NK. Persistent Presence of Spike protein and Viral RNA in the Circulation of Individuals with Post-Acute Sequelae of COVID-19. *Infectious Diseases (except HIV/AIDS)*; 2022 Aug. <https://doi.org/10.1101/2022.08.07.22278520>
97. Kwon Y, Nukala SB, Srivastava S, Miyamoto H, Ismail NI, Jousma J, et al. Detection of viral RNA fragments in human iPSC cardiomyocytes following treatment with extracellular vesicles from SARS-CoV-2 coding sequence overexpressing lung epithelial cells. *Stem Cell Res Ther*. 2020; 11:514. <https://doi.org/10.1186/s13287-020-02033-7> PMID: 33256833
98. Barberis E, Vanella VV, Falasca M, Caneapero V, Cappellano G, Raineri D, et al. Circulating Exosomes Are Strongly Involved in SARS-CoV-2 Infection. *Front Mol Biosci*. 2021; 8:632290. <https://doi.org/10.3389/fmolb.2021.632290> PMID: 33693030
99. Millar JE, Fanning JP, McDonald CI, McAuley DF, Fraser JF. The inflammatory response to extracorporeal membrane oxygenation (ECMO): a review of the pathophysiology. *Crit Care*. 2016; 20:387. <https://doi.org/10.1186/s13054-016-1570-4> PMID: 27890016
100. Allnoch L, Beythien G, Leitzen E, Becker K, Kaup F-J, Stanelle-Bertram S, et al. Vascular Inflammation Is Associated with Loss of Aquaporin 1 Expression on Endothelial Cells and Increased Fluid Leakage in SARS-CoV-2 Infected Golden Syrian Hamsters. *Viruses*. 2021; 13:639. <https://doi.org/10.3390/v13040639> PMID: 33918079
101. Zhang J, Alcaide P, Liu L, Sun J, He A, Luscinskas FW, et al. Regulation of endothelial cell adhesion molecule expression by mast cells, macrophages, and neutrophils. *PLoS ONE*. 2011; 6:e14525. <https://doi.org/10.1371/journal.pone.0014525> PMID: 21264293
102. Muller WA. Leukocyte-Endothelial Cell Interactions in the Inflammatory Response. *Lab Invest*. 2002; 82:521–534. <https://doi.org/10.1038/labinvest.3780446> PMID: 12003992
103. Hunt BJ, Jurd KM. Endothelial cell activation. *BMJ*. 1998; 316:1328–1329. <https://doi.org/10.1136/bmj.316.7141.1328> PMID: 9563977
104. Birnhuber A, Fließner E, Gorkiewicz G, Zacharias M, Seeliger B, David S, et al. Between inflammation and thrombosis: endothelial cells in COVID-19. *Eur Respir J*. 2021; 58:2100377. <https://doi.org/10.1183/13993003.00377-2021> PMID: 33958433
105. Sims JT, Krishnan V, Chang C-Y, Engle SM, Casalini G, Rodgers GH, et al. Characterization of the cytokine storm reflects hyperinflammatory endothelial dysfunction in COVID-19. *J Allergy Clin Immunol*. 2021; 147:107–111. <https://doi.org/10.1016/j.jaci.2020.08.031> PMID: 32920092
106. Gavriatopoulou M, Korompoki E, Fotiou D, Ntanasis-Stathopoulos I, Psaltopoulou T, Kastritis E, et al. Organ-specific manifestations of COVID-19 infection. *Clin Exp Med*. 2020; 20:493–506. <https://doi.org/10.1007/s10238-020-00648-x> PMID: 32720223
107. Herrmann J, Mori V, Bates JHT, Suki B. Can Hyperperfusion of Non-aerated Lung Explain COVID-19 Hypoxia? *Res Sq*. 2020:rs.3.rs–32949. <https://doi.org/10.21203/rs.3.rs-32949/v1> PMID: 32702716
108. Gattinoni L, Coppola S, Cressoni M, Busana M, Rossi S, Chiumello D. COVID-19 Does Not Lead to a “Typical” Acute Respiratory Distress Syndrome. *Am J Respir Crit Care Med*. 2020; 201:1299–1300. <https://doi.org/10.1164/rccm.202003-0817LE> PMID: 32228035
109. Teo J. Early Detection of Silent Hypoxia in Covid-19 Pneumonia Using Smartphone Pulse Oximetry. *J Med Syst*. 2020; 44:134. <https://doi.org/10.1007/s10916-020-01587-6> PMID: 32562006
110. Dhont S, Derom E, Van Braeckel E, Depuydt P, Lambrecht BN. The pathophysiology of “happy” hypoxemia in COVID-19. *Respir Res*. 2020; 21:198. <https://doi.org/10.1186/s12931-020-01462-5> PMID: 32723327
111. Viecca M, Radovanovic D, Forleo GB, Santus P. Enhanced platelet inhibition treatment improves hypoxemia in patients with severe Covid-19 and hypercoagulability. A case control, proof of concept study. *Pharmacol Res*. 2020; 158:104950. <https://doi.org/10.1016/j.phrs.2020.104950> PMID: 32450344
112. Creel-Bulos C, Hockstein M, Amin N, Melhem S, Truong A, Sharifpour M. Acute Cor Pulmonale in Critically Ill Patients with Covid-19. *N Engl J Med*. 2020; 382:e70. <https://doi.org/10.1056/NEJMc2010459> PMID: 32374956
113. Kosanovic D, Yaroshetskiy AI, Tsareva NA, Merzhoeva ZM, Trushenko NV, Nekludova GV, et al. Recombinant tissue plasminogen activator treatment for COVID-19 associated ARDS and acute cor pulmonale. *Int J Infect Dis*. 2021; 104:108–110. <https://doi.org/10.1016/j.ijid.2020.12.043> PMID: 33352323

114. Jardin F, Vieillard-Baron A. Acute cor pulmonale. *Curr Opin Crit Care*. 2009; 15:67–70. <https://doi.org/10.1097/mcc.0b013e3283220ddd> PMID: 19186411
115. Argulian E, Sud K, Vogel B, Bohra C, Garg VP, Talebi S, et al. Right Ventricular Dilation in Hospitalized Patients With COVID-19 Infection. *JACC Cardiovasc Imaging*. 2020; 13:2459–2461. <https://doi.org/10.1016/j.jcmg.2020.05.010> PMID: 32426088
116. Szekely Y, Lichter Y, Taieb P, Banai A, Hochstadt A, Merdler I, et al. Spectrum of Cardiac Manifestations in COVID-19: A Systematic Echocardiographic Study. *Circulation*. 2020; 142:342–353. <https://doi.org/10.1161/CIRCULATIONAHA.120.047971> PMID: 32469253
117. Pagnesi M, Baldetti L, Beneduce A, Calvo F, Gramegna M, Pazzanese V, et al. Pulmonary hypertension and right ventricular involvement in hospitalised patients with COVID-19. *Heart Br Card Soc*. 2020; 106:1324–1331. <https://doi.org/10.1136/heartjnl-2020-317355> PMID: 32675217
118. Norderfeldt J, Liliequist A, Eksborg S, Frostell C, Eriksson MJ, Adding C, et al. Severe Covid-19 and Acute Pulmonary Hypertension: 24-month follow-up regarding mortality and relationship to initial echocardiographic findings and biomarkers. *Acta Anaesthesiol Scand*. 2022. <https://doi.org/10.1111/aas.14168> PMID: 36333823
119. Hama Amin BJ, Kakamad FH, Ahmed GS, Ahmed SF, Abdulla BA, Mohammed SH, et al. Post COVID-19 pulmonary fibrosis; a meta-analysis study. *Ann Med Surg*. 2012; 2022(77):103590. <https://doi.org/10.1016/j.amsu.2022.103590> PMID: 35411216
120. Cho JL, Villacreses R, Nagpal P, Guo J, Pezzulo AA, Thurman AL, et al. Quantitative Chest CT Assessment of Small Airways Disease in Post-Acute SARS-CoV-2 Infection. *Radiology*. 2022; 304:185–192. <https://doi.org/10.1148/radiol.212170> PMID: 35289657
121. Kruger A, Vlok M, Turner S, Venter C, Laubscher GJ, Kell DB, et al. Proteomics of fibrin amyloid microclots in long COVID/post-acute sequelae of COVID-19 (PASC) shows many entrapped pro-inflammatory molecules that may also contribute to a failed fibrinolytic system. *Cardiovasc Diabetol*. 2022; 21:190. <https://doi.org/10.1186/s12933-022-01623-4> PMID: 36131342
122. Montani D, Certain M-C, Weatherald J, Jaïs X, Bulifon S, Noel-Savina E, et al. COVID-19 in Patients with Pulmonary Hypertension: A National Prospective Cohort Study. *Am J Respir Crit Care Med*. 2022; 206:573–583. <https://doi.org/10.1164/rccm.202112-2761OC> PMID: 35549842
123. Huang L, Zhao P, Tang D, Zhu T, Han R, Zhan C, et al. Cardiac Involvement in Patients Recovered From COVID-2019 Identified Using Magnetic Resonance Imaging. *JACC Cardiovasc Imaging*. 2020; 13:2330–2339. <https://doi.org/10.1016/j.jcmg.2020.05.004> PMID: 32763118
124. Tudoran C, Tudoran M, Pop GN, Giurgi-Onocu C, Cut TG, Lazureanu VE, et al. Associations between the Severity of the Post-Acute COVID-19 Syndrome and Echocardiographic Abnormalities in Previously Healthy Outpatients Following Infection with SARS-CoV-2. *Biology*. 2021; 10:469. <https://doi.org/10.3390/biology10060469> PMID: 34073342
125. Wolters AEP, Wolters AJP, van Kraaij TDA, Kietselaer BLJH. Echocardiographic estimation of pulmonary hypertension in COVID-19 patients. *Neth Heart J*. 2022; 30:510–518. <https://doi.org/10.1007/s12471-022-01702-x> PMID: 35771380
126. Chang R, Mamun A, Dominic A, Le N-T. SARS-CoV-2 Mediated Endothelial Dysfunction: The Potential Role of Chronic Oxidative Stress. *Front Physiol*. 2020; 11:605908. <https://doi.org/10.3389/fphys.2020.605908> PMID: 33519510
127. Fodor A, Tipericiu B, Login C, Orasan OH, Lazar AL, Buchman C, et al. Endothelial Dysfunction, Inflammation, and Oxidative Stress in COVID-19-Mechanisms and Therapeutic Targets. *Oxid Med Cell Longev*. 2021; 2021:8671713. <https://doi.org/10.1155/2021/8671713> PMID: 34457119
128. Kumar R, Mickael C, Kassa B, Gebreab L, Robinson JC, Koyanagi DE, et al. TGF- $\beta$  activation by bone marrow-derived thrombospondin-1 causes Schistosoma- and hypoxia-induced pulmonary hypertension. *Nat Commun*. 2017; 8:15494. <https://doi.org/10.1038/ncomms15494> PMID: 28555642
129. Kumar R, Mickael C, Chabon J, Gebreab L, Rutebemberwa A, Garcia AR, et al. The Causal Role of IL-4 and IL-13 in Schistosoma mansoni Pulmonary Hypertension. *Am J Respir Crit Care Med*. 2015; 192:998–1008. <https://doi.org/10.1164/rccm.201410-1820OC> PMID: 26192556
130. Du F, Liu B, Zhang S. COVID-19: the role of excessive cytokine release and potential ACE2 down-regulation in promoting hypercoagulable state associated with severe illness. *J Thromb Thrombolysis*. 2021; 51:313–329. <https://doi.org/10.1007/s11239-020-02224-2> PMID: 32676883
131. Kichloo A, Dettloff K, Aljadah M, Albosta M, Jamal S, Singh J, et al. COVID-19 and Hypercoagulability: A Review. *Clin Appl Thromb Hemost*. 2020; 26:1076029620962853. <https://doi.org/10.1177/1076029620962853> PMID: 33074732
132. Andruska A, Spiekerkoetter E. Consequences of BMPR2 Deficiency in the Pulmonary Vasculature and Beyond: Contributions to Pulmonary Arterial Hypertension. *Int J Mol Sci*. 2018; 19:E2499. <https://doi.org/10.3390/ijms19092499> PMID: 30149506

133. Humbert M, Monti G, Brenot F, Sitbon O, Portier A, Grangeot-Keros L, et al. Increased interleukin-1 and interleukin-6 serum concentrations in severe primary pulmonary hypertension. *Am J Respir Crit Care Med.* 1995; 151:1628–1631. <https://doi.org/10.1164/ajrccm.151.5.7735624> PMID: 7735624
134. Tu L, Desroches-Castan A, Mallet C, Guyon L, Cumont A, Phan C, et al. Selective BMP-9 Inhibition Partially Protects Against Experimental Pulmonary Hypertension. *Circ Res.* 2019; 124:846–855. <https://doi.org/10.1161/CIRCRESAHA.118.313356> PMID: 30636542
135. Soon E, Holmes AM, Treacy CM, Doughty NJ, Southgate L, Machado RD, et al. Elevated levels of inflammatory cytokines predict survival in idiopathic and familial pulmonary arterial hypertension. *Circulation.* 2010; 122:920–927. <https://doi.org/10.1161/CIRCULATIONAHA.109.933762> PMID: 20713898
136. Hurst LA, Dunmore BJ, Long L, Crosby A, Al-Lamki R, Deighton J, et al. TNF $\alpha$  drives pulmonary arterial hypertension by suppressing the BMP type-II receptor and altering NOTCH signalling. *Nat Commun.* 2017; 8:14079. <https://doi.org/10.1038/ncomms14079> PMID: 28084316
137. Burel-Vandenbos F, Cardot-Leccia N, Passeron T. Apoptosis and pericyte loss in alveolar capillaries in COVID-19 infection: choice of markers matters. Author's reply. *Intensive Care Med.* 2020; 46:1967–1968. <https://doi.org/10.1007/s00134-020-06220-1> PMID: 32844260
138. Cardot-Leccia N, Hubiche T, Dellamonica J, Burel-Vandenbos F, Passeron T. Pericyte alteration sheds light on micro-vasculopathy in COVID-19 infection. *Intensive Care Med.* 2020; 46:1777–1778. <https://doi.org/10.1007/s00134-020-06147-7> PMID: 32533198
139. Cascino TM, Desai AA, Kanthi Y. At a crossroads: coronavirus disease 2019 recovery and the risk of pulmonary vascular disease. *Curr Opin Pulm Med.* 2021; 27:342–349. <https://doi.org/10.1097/MCP.0000000000000792> PMID: 34127622
140. Swank Z, Senussi Y, Manickas-Hill Z, Yu XG, Li JZ, Alter G, et al. Persistent circulating SARS-CoV-2 spike is associated with post-acute COVID-19 sequelae. *Clin Infect Dis.* 2022:ciac722. <https://doi.org/10.1093/cid/ciac722> PMID: 36052466
141. Suzuki YJ, Nikolaienko SI, Dibrova VA, Dibrova YV, Vasylyk VM, Novikov MY, et al. SARS-CoV-2 spike protein-mediated cell signaling in lung vascular cells. *Vascul Pharmacol.* 2021; 137:106823. <https://doi.org/10.1016/j.vph.2020.106823> PMID: 33232769
142. Patterson BK, Francisco EB, Yogendra R, Long E, Pise A, Rodrigues H, et al. Persistence of SARS CoV-2 S1 Protein in CD16+ Monocytes in Post-Acute Sequelae of COVID-19 (PASC) up to 15 Months Post-Infection. *Front Immunol.* 2021; 12:746021. <https://doi.org/10.3389/fimmu.2021.746021> PMID: 35082777
143. Gassen NC, Papies J, Bajaj T, Emanuel J, Dethloff F, Chua RL, et al. SARS-CoV-2-mediated dysregulation of metabolism and autophagy uncovers host-targeting antivirals. *Nat Commun.* 2021; 12:3818. <https://doi.org/10.1038/s41467-021-24007-w> PMID: 34155207
144. Lakshmana MK. SARS-CoV-2-induced autophagy dysregulation may cause neuronal dysfunction in COVID-19. *Neural Regen Res.* 2022; 17:1255–1256. <https://doi.org/10.4103/1673-5374.327333> PMID: 34782561
145. Tejerina F, Catalan P, Rodriguez-Grande C, Adan J, Rodriguez-Gonzalez C, Muñoz P, et al. Post-COVID-19 syndrome. SARS-CoV-2 RNA detection in plasma, stool, and urine in patients with persistent symptoms after COVID-19. *BMC Infect Dis.* 2022; 22:211. <https://doi.org/10.1186/s12879-022-07153-4> PMID: 35240997
146. Dao TL, Hoang VT, Gautret P. Recurrence of SARS-CoV-2 viral RNA in recovered COVID-19 patients: a narrative review. *Eur J Clin Microbiol Infect Dis.* 2021; 40:13–25. <https://doi.org/10.1007/s10096-020-04088-z> PMID: 33113040
147. Katz MH. Challenges in Testing for SARS-CoV-2 Among Patients Who Recovered From COVID-19. *JAMA Intern Med.* 2021; 181:704–705. <https://doi.org/10.1001/jamainternmed.2020.7575> PMID: 33180094
148. Fischer W, Giorgi EE, Chakraborty S, Nguyen K, Bhattacharya T, Theiler J, et al. HIV-1 and SARS-CoV-2: Patterns in the evolution of two pandemic pathogens. *Cell Host Microbe.* 2021; 29:1093–1110. <https://doi.org/10.1016/j.chom.2021.05.012> PMID: 34242582
149. Griffin DE. Why does viral RNA sometimes persist after recovery from acute infections? *PLoS Biol.* 2022; 20:e3001687. <https://doi.org/10.1371/journal.pbio.3001687> PMID: 35648781
150. Randall RE, Griffin DE. Within host RNA virus persistence: mechanisms and consequences. *Curr Opin Virol.* 2017; 23:35–42. <https://doi.org/10.1016/j.coviro.2017.03.001> PMID: 28319790
151. Dalvi P, Sharma H, Konstantinova T, Sanderson M, Brien-Ladner AO, Dhillion NK. Hyperactive TGF- $\beta$  Signaling in Smooth Muscle Cells Exposed to HIV-protein(s) and Cocaine: Role in Pulmonary Vasculopathy. *Sci Rep.* 2017; 7:10433. <https://doi.org/10.1038/s41598-017-10438-3> PMID: 28874783



152. Harter ZJ, Agarwal S, Dalvi P, Voelkel NF, Dhillon NK. Drug abuse and HIV-related pulmonary hypertension: double hit injury. *AIDS*. 2018; 32:2651–2667. <https://doi.org/10.1097/QAD.0000000000002030> PMID: 30234598
153. de Man FS, Tu L, Handoko ML, Rain S, Ruiters G, François C, et al. Dysregulated renin-angiotensin-aldosterone system contributes to pulmonary arterial hypertension. *Am J Respir Crit Care Med*. 2012; 186:780–789. <https://doi.org/10.1164/rccm.201203-0411OC> PMID: 22859525
154. de Man FS, Handoko ML, Guignabert C, Bogaard HJ, Vonk-Noordegraaf A. Neurohormonal axis in patients with pulmonary arterial hypertension: friend or foe? *Am J Respir Crit Care Med*. 2013; 187:14–19. <https://doi.org/10.1164/rccm.201209-1663PP> PMID: 23144327
155. Xie L, Lin P, Xie H, Xu C. Effects of atorvastatin and losartan on monocrotaline-induced pulmonary artery remodeling in rats. *Clin Exp Hypertens N Y N*. 1993; 2010(32):547–554. <https://doi.org/10.3109/10641963.2010.503295> PMID: 21091363
156. Lahm T, Hess E, Barón AE, Maddox TM, Plomondon ME, Choudhary G, et al. Renin-Angiotensin-Aldosterone System Inhibitor Use and Mortality in Pulmonary Hypertension: Insights From the Veterans Affairs Clinical Assessment Reporting and Tracking Database. *Chest*. 2021; 159:1586–1597. <https://doi.org/10.1016/j.chest.2020.09.258> PMID: 33031831
157. Pérez-Vizcaíno F. Lung ACE2 and ADAM17 in pulmonary arterial hypertension: Implications for COVID-19? *J Heart Lung Transplant*. 2020; 39:1167–1169. <https://doi.org/10.1016/j.healun.2020.07.003> PMID: 32762876
158. Ferreira AJ, Shenoy V, Yamazato Y, Sriramula S, Francis J, Yuan L, et al. Evidence for angiotensin-converting enzyme 2 as a therapeutic target for the prevention of pulmonary hypertension. *Am J Respir Crit Care Med*. 2009; 179:1048–1054. <https://doi.org/10.1164/rccm.200811-1678OC> PMID: 19246717
159. Shen H, Zhang J, Wang C, Jain PP, Xiong M, Shi X, et al. MDM2-Mediated Ubiquitination of Angiotensin-Converting Enzyme 2 Contributes to the Development of Pulmonary Arterial Hypertension. *Circulation*. 2020; 142:1190–1204. <https://doi.org/10.1161/CIRCULATIONAHA.120.048191> PMID: 32755395
160. Sandoval J, Del Valle-Mondragón L, Masso F, Zayas N, Pulido T, Teijeiro R, et al. Angiotensin converting enzyme 2 and angiotensin (1–7) axis in pulmonary arterial hypertension. *Eur Respir J*. 2020; 56:1902416. <https://doi.org/10.1183/13993003.02416-2019> PMID: 32241831
161. Bradford CN, Ely DR, Raizada MK. Targeting the Vasoprotective Axis of the Renin-Angiotensin System: A Novel Strategic Approach to Pulmonary Hypertensive Therapy. *Curr Hypertens Rep*. 2010; 12:212–219. <https://doi.org/10.1007/s11906-010-0122-6> PMID: 20556668
162. Rabinovitch M. EVE and beyond, retro and prospective insights. *Am J Physiol*. 1999; 277:L5–L12. <https://doi.org/10.1152/ajplung.1999.277.1.L5> PMID: 10409225
163. Kobayashi J, Wigle D, Childs T, Zhu L, Keeley FW, Rabinovitch M. Serum-induced vascular smooth muscle cell elastolytic activity through tyrosine kinase intracellular signalling. *J Cell Physiol*. 1994; 160:121–131. <https://doi.org/10.1002/jcp.1041600115> PMID: 8021292
164. Galiè N, Humbert M, Vachiery J-L, Gibbs S, Lang I, Torbicki A, et al. 2015 ESC/ERS Guidelines for the diagnosis and treatment of pulmonary hypertension: The Joint Task Force for the Diagnosis and Treatment of Pulmonary Hypertension of the European Society of Cardiology (ESC) and the European Respiratory Society (ERS): Endorsed by: Association for European Paediatric and Congenital Cardiology (AEPC), International Society for Heart and Lung Transplantation (ISHLT). *Eur Heart J*. 2016; 37:67–119. <https://doi.org/10.1093/eurheartj/ehv317> PMID: 26320113
165. Italia L, Tomasoni D, Bisegna S, Pancaldi E, Stretti L, Adamo M, et al. COVID-19 and Heart Failure: From Epidemiology During the Pandemic to Myocardial Injury, Myocarditis, and Heart Failure Sequelae. *Front Cardiovasc Med*. 2021; 8:713560. <https://doi.org/10.3389/fcvm.2021.713560> PMID: 34447795
166. Xie Y, Xu E, Bowe B, Al-Aly Z. Long-term cardiovascular outcomes of COVID-19. *Nat Med*. 2022; 28:583–590. <https://doi.org/10.1038/s41591-022-01689-3> PMID: 35132265
167. Masarone D, Limongelli G, Rubino M, Valente F, Vastarella R, Ammendola E, et al. Management of Arrhythmias in Heart Failure. *J Cardiovasc Dev Dis*. 2017; 4:E3. <https://doi.org/10.3390/jcdd4010003> PMID: 29367535
168. Anter E, Jessup M, Callans DJ. Atrial fibrillation and heart failure: treatment considerations for a dual epidemic. *Circulation*. 2009; 119:2516–2525. <https://doi.org/10.1161/CIRCULATIONAHA.108.821306> PMID: 19433768
169. Jones IR. The pathogenesis and treatment of Graves' ophthalmopathy. *Postgrad Med J*. 1987; 63:731–733. <https://doi.org/10.1136/pgmj.63.743.731> PMID: 3444795



170. Lindner D, Fitzek A, Bräuninger H, Aleshcheva G, Edler C, Meissner K, et al. Association of Cardiac Infection With SARS-CoV-2 in Confirmed COVID-19 Autopsy Cases. *JAMA Cardiol.* 2020; 5:1281–1285. <https://doi.org/10.1001/jamacardio.2020.3551> PMID: 32730555
171. Lettieri CJ, Nathan SD, Barnett SD, Ahmad S, Shorr AF. Prevalence and outcomes of pulmonary arterial hypertension in advanced idiopathic pulmonary fibrosis. *Chest.* 2006; 129:746–752. <https://doi.org/10.1378/chest.129.3.746> PMID: 16537877
172. Saito A, Horie M, Nagase T. TGF- $\beta$  Signaling in Lung Health and Disease. *Int J Mol Sci.* 2018; 19:E2460. <https://doi.org/10.3390/ijms19082460> PMID: 30127261
173. King TE, Pardo A, Selman M. Idiopathic pulmonary fibrosis. *Lancet.* 2011; 378:1949–1961. [https://doi.org/10.1016/S0140-6736\(11\)60052-4](https://doi.org/10.1016/S0140-6736(11)60052-4) PMID: 21719092
174. Barratt SL, Creamer A, Hayton C, Chaudhuri N. Idiopathic Pulmonary Fibrosis (IPF): An Overview. *J Clin Med.* 2018; 7:E201. <https://doi.org/10.3390/jcm7080201> PMID: 30082599
175. Rol N, Kurakula KB, Happé C, Bogaard HJ, Goumans M-J. TGF- $\beta$  and BMPR2 Signaling in PAH: Two Black Sheep in One Family. *Int J Mol Sci.* 2018; 19:E2585. <https://doi.org/10.3390/ijms19092585> PMID: 30200294
176. Spagnolo P, Balestro E, Aliberti S, Cocconcilli E, Biondini D, Casa GD, et al. Pulmonary fibrosis secondary to COVID-19: a call to arms? *Lancet Respir Med.* 2020; 8:750–752. [https://doi.org/10.1016/S2213-2600\(20\)30222-8](https://doi.org/10.1016/S2213-2600(20)30222-8) PMID: 32422177
177. John AE, Joseph C, Jenkins G, Tatler AL. COVID-19 and pulmonary fibrosis: A potential role for lung epithelial cells and fibroblasts. *Immunol Rev.* 2021; 302:228–240. <https://doi.org/10.1111/imr.12977> PMID: 34028807
178. Ferreira-Gomes M, Kruglov A, Durek P, Heinrich F, Tizian C, Heinz GA, et al. SARS-CoV-2 in severe COVID-19 induces a TGF- $\beta$ -dominated chronic immune response that does not target itself. *Nat Commun.* 2021; 12:1961. <https://doi.org/10.1038/s41467-021-22210-3> PMID: 33785765
179. Doane JJ, Hirsch KS, Baldwin JO, Wurfel MM, Pipavath SN, West TE. Progressive Pulmonary Fibrosis After Non-Critical COVID-19: A Case Report. *Am J Case Rep.* 2021; 22. <https://doi.org/10.12659/AJCR.933458> PMID: 34848676
180. Udwadia Z, Koul P, Richeldi L. Post-COVID lung fibrosis: The tsunami that will follow the earthquake. *Lung India.* 2021; 38:41. [https://doi.org/10.4103/lungindia.lungindia\\_818\\_20](https://doi.org/10.4103/lungindia.lungindia_818_20) PMID: 33686978
181. Hall DJ, Schulte JJ, Lewis EE, Bommareddi SR, Rohrer CT, Sultan S, et al. Successful Lung Transplantation for Severe Post-COVID-19 Pulmonary Fibrosis. *Ann Thorac Surg.* 2022; 114:e17–e19. <https://doi.org/10.1016/j.athoracsur.2021.10.004> PMID: 34748736
182. Vaz de Paula CB, Nagashima S, Liberalesso V, Collete M, da Silva FPG, Oricil AGG, et al. COVID-19: Immunohistochemical Analysis of TGF- $\beta$  Signaling Pathways in Pulmonary Fibrosis. *Int J Mol Sci.* 2021; 23:168. <https://doi.org/10.3390/ijms23010168> PMID: 35008594
183. Malczyk M, Veith C, Schermuly RT, Gudermann T, Dietrich A, Sommer N, et al. NADPH oxidases-do they play a role in TRPC regulation under hypoxia? *Pflugers Arch.* 2016; 468:23–41. <https://doi.org/10.1007/s00424-015-1731-3> PMID: 26424109
184. Algahtani FH, AlQahtany FS, Al-Shehri A, Abdelgader AM. Features and incidence of thromboembolic disease: A comparative study between high and low altitude dwellers in Saudi Arabia. *Saudi J Biol Sci.* 2020; 27:1632–1636. <https://doi.org/10.1016/j.sjbs.2020.03.004> PMID: 32489304
185. Dutta V, Singh R, Kumar S, Aggarwal N, Hari Kumar KVS. Profile of pulmonary embolism in service personnel posted at high altitude area. *Indian Heart J.* 2018; 70:427–429. <https://doi.org/10.1016/j.ihj.2017.08.002> PMID: 29961462
186. Hull CM, Rajendran D, Fernandez BA. Deep Vein Thrombosis and Pulmonary Embolism in a Mountain Guide: Awareness, Diagnostic Challenges, and Management Considerations at Altitude. *Wilderness Environ Med.* 2016; 27:100–106. <https://doi.org/10.1016/j.wem.2015.10.010> PMID: 26723546
187. Singhal S, Bhattachar SA, Paliwal V, Malhotra VK, Addya K, Kotwal A. Pulmonary Embolism in Young Natives of High Altitude. *Heart Views.* 2016; 17:62–65. <https://doi.org/10.4103/1995-705X.185115> PMID: 27512534
188. Schobersberger W, Hoffmann G, Gunga H-C. [Interaction of hypoxia and haemostasis—hypoxia as a prothrombotic factor at high altitude?]. *Wien Med Wochenschr.* 2005; 155:157–162. <https://doi.org/10.1007/s10354-005-0163-7> PMID: 15966261
189. Shang C, Wuren T, Ga Q, Bai Z, Guo L, Eustes AS, et al. The human platelet transcriptome and proteome is altered and pro-thrombotic functional responses are increased during prolonged hypoxia exposure at high altitude. *Platelets.* 2020; 31:33–42. <https://doi.org/10.1080/09537104.2019.1572876> PMID: 30721642
190. Pujhari S, Paul S, Ahluwalia J, Rasgon JL. Clotting disorder in severe acute respiratory syndrome coronavirus 2. *Rev Med Virol.* 2021; 31:e2177. <https://doi.org/10.1002/rmv.2177> PMID: 33022790

191. Arias-Reyes C, Zubieta-DeUrioste N, Poma-Machicao L, Aliaga-Raduan F, Carvajal-Rodriguez F, Dutschmann M, et al. Does the pathogenesis of SARS-CoV-2 virus decrease at high-altitude? *Respir Physiol Neurobiol.* 2020; 277:103443. <https://doi.org/10.1016/j.resp.2020.103443> PMID: 32333993
192. Accinelli RA, Leon-Abarca JA. En la altura la COVID-19 es menos frecuente: la experiencia del Perú. *Arch Bronconeumol.* 2020; 56:760–761. <https://doi.org/10.1016/j.arbres.2020.06.015> PMID: 32782091
193. Segovia-Juarez J, Castagnetto JM, Gonzales GF. High altitude reduces infection rate of COVID-19 but not case-fatality rate. *Respir Physiol Neurobiol.* 2020; 281:103494. <https://doi.org/10.1016/j.resp.2020.103494> PMID: 32679369
194. Semple JL, Moore GWK. High levels of ambient ozone (O<sub>3</sub>) may impact COVID-19 in high altitude mountain environments. *Respir Physiol Neurobiol.* 2020; 280:103487. <https://doi.org/10.1016/j.resp.2020.103487> PMID: 32619691
195. Champigneulle B, Hanco I, Renan R, Doutreleau S, Stauffer E, Pichon A, et al. High-Altitude Environment and COVID-19: SARS-CoV-2 Seropositivity in the Highest City in the World. *High Alt Med Biol.* 2021. <https://doi.org/10.1089/ham.2021.0020> PMID: 34197184
196. Woolcott OO, Bergman RN. Mortality Attributed to COVID-19 in High-Altitude Populations. *High Alt Med Biol.* 2020; 21:409–416. <https://doi.org/10.1089/ham.2020.0098> PMID: 32815745
197. Burtcher J, Burtcher M, Millet GP. Caution is needed on the effect of altitude on the pathogenesis of SAR-CoV-2 virus. *Respir Physiol Neurobiol.* 2020; 279:103464. <https://doi.org/10.1016/j.resp.2020.103464> PMID: 32447057
198. Huamani C, Velásquez L, Montes S, Miranda-Solis F. Propagation by COVID-19 at high altitude: Cusco case. *Respir Physiol Neurobiol.* 2020; 279:103448. <https://doi.org/10.1016/j.resp.2020.103448> PMID: 32437878
199. Pun M, Turner R, Strapazzon G, Brugger H, Swenson ER. Lower Incidence of COVID-19 at High Altitude: Facts and Confounders. *High Alt Med Biol.* 2020; 21:217–222. <https://doi.org/10.1089/ham.2020.0114> PMID: 32716669
200. Barron E, Bakhai C, Kar P, Weaver A, Bradley D, Ismail H, et al. Associations of type 1 and type 2 diabetes with COVID-19-related mortality in England: a whole-population study. *Lancet Diabetes Endocrinol.* 2020; 8:813–822. [https://doi.org/10.1016/S2213-8587\(20\)30272-2](https://doi.org/10.1016/S2213-8587(20)30272-2) PMID: 32798472
201. Bellido V, Pérez A. COVID-19 and Diabetes. *J Clin Med.* 2021; 10:5341. <https://doi.org/10.3390/jcm10225341> PMID: 34830623
202. Movahed M-R, Hashemzadeh M, Jamal MM. The prevalence of pulmonary embolism and pulmonary hypertension in patients with type II diabetes mellitus. *Chest.* 2005; 128:3568–3571. <https://doi.org/10.1378/chest.128.5.3568> PMID: 16304314
203. Abernethy AD, Stackhouse K, Hart S, Devendra G, Bashore TM, Dweik R, et al. Impact of diabetes in patients with pulmonary hypertension. *Pulm Circ.* 2015; 5:117–123. <https://doi.org/10.1086/679705> PMID: 25992276
204. Avogaro A, Albiero M, Menegazzo L, de Kreutzenberg S, Fadini GP. Endothelial dysfunction in diabetes: the role of reparatory mechanisms. *Diabetes Care.* 2011; 34(Suppl 2):S285–S290. <https://doi.org/10.2337/dc11-s239> PMID: 21525470
205. Rask-Madsen C, King GL. Vascular complications of diabetes: mechanisms of injury and protective factors. *Cell Metab.* 2013; 17:20–33. <https://doi.org/10.1016/j.cmet.2012.11.012> PMID: 23312281
206. Guazzi M, Borlaug BA. Pulmonary hypertension due to left heart disease. *Circulation.* 2012; 126:975–990. <https://doi.org/10.1161/CIRCULATIONAHA.111.085761> PMID: 22908015
207. Thangarajah H, Vial IN, Grogan RH, Yao D, Shi Y, Januszyk M, et al. HIF-1 $\alpha$  dysfunction in diabetes. *Cell Cycle.* 2010; 9:75–79. <https://doi.org/10.4161/cc.9.1.10371> PMID: 20016290
208. Ferrara N. Vascular endothelial growth factor: basic science and clinical progress. *Endocr Rev.* 2004; 25:581–611. <https://doi.org/10.1210/er.2003-0027> PMID: 15294883
209. Barman SA. Vasoconstrictor effect of endothelin-1 on hypertensive pulmonary arterial smooth muscle involves Rho-kinase and protein kinase C. *Am J Physiol Lung Cell Mol Physiol.* 2007; 293:L472–L479. <https://doi.org/10.1152/ajplung.00101.2006> PMID: 17468135
210. Humbert M, Sitbon O, Simonneau G. Treatment of pulmonary arterial hypertension. *N Engl J Med.* 2004; 351:1425–1436. <https://doi.org/10.1056/NEJMra040291> PMID: 15459304
211. Brown AE, Croxford SE, Nash S, Khawam J, Kirwan P, Kall M, et al. COVID-19 mortality among people with diagnosed HIV compared to those without during the first wave of the COVID-19 pandemic in England. *HIV Med.* 2022; 23:90–102. <https://doi.org/10.1111/hiv.13167> PMID: 34528739
212. Tesoriero JM, Swain C-AE, Pierce JL, Zamboni L, Wu M, Holtgrave DR, et al. COVID-19 Outcomes Among Persons Living With or Without Diagnosed HIV Infection in New York State. *JAMA Netw Open.* 2021; 4:e2037069. <https://doi.org/10.1001/jamanetworkopen.2020.37069> PMID: 33533933

213. Bhaskaran K, Rentsch CT, MacKenna B, Schultze A, Mehrkar A, Bates CJ, et al. HIV infection and COVID-19 death: a population-based cohort analysis of UK primary care data and linked national death registrations within the OpenSAFELY platform. *Lancet HIV*. 2021; 8:e24–e32. [https://doi.org/10.1016/S2352-3018\(20\)30305-2](https://doi.org/10.1016/S2352-3018(20)30305-2) PMID: 33316211
214. O’Keefe JB, Minton HC, Morrow M, Johnson C, Moore MA, O’Keefe GAD, et al. Postacute Sequelae of SARS-CoV-2 Infection and Impact on Quality of Life 1–6 Months After Illness and Association With Initial Symptom Severity. *Open Forum. Infect Dis*. 2021; 8:ofab352. <https://doi.org/10.1093/ofid/ofab352> PMID: 34395709
215. Peluso MJ, Spinelli MA, Deveau T-M, Forman CA, Munter SE, Mathur S, et al. Post-acute sequelae and adaptive immune responses in people living with HIV recovering from SARS-COV-2 infection. *AIDS*. 2022. <https://doi.org/10.1097/QAD.0000000000003338> PMID: 35866847
216. Woodham AW, Skeate JG, Sanna AM, Taylor JR, Da Silva DM, Cannon PM, et al. Human Immunodeficiency Virus Immune Cell Receptors, Coreceptors, and Cofactors: Implications for Prevention and Treatment. *AIDS Patient Care STDs*. 2016; 30:291–306. <https://doi.org/10.1089/apc.2016.0100> PMID: 27410493
217. Lambarey H, Blumenthal MJ, Chetram A, Joyimbana W, Jennings L, Tincho MB, et al. SARS-CoV-2 Infection Is Associated with Uncontrolled HIV Viral Load in Non-Hospitalized HIV-Infected Patients from Gugulethu, South Africa. *Viruses*. 2022; 14:1222. <https://doi.org/10.3390/v14061222> PMID: 35746693
218. Spikes L, Dalvi P, Tawfik O, Gu H, Voelkel NF, Cheney P, et al. Enhanced pulmonary arteriopathy in simian immunodeficiency virus-infected macaques exposed to morphine. *Am J Respir Crit Care Med*. 2012; 185:1235–1243. <https://doi.org/10.1164/rccm.201110-1909OC> PMID: 22447963
219. Dhillon NK, Li F, Xue B, Tawfik O, Morgello S, Buch S, et al. Effect of cocaine on human immunodeficiency virus-mediated pulmonary endothelial and smooth muscle dysfunction. *Am J Respir Cell Mol Biol*. 2011; 45:40–52. <https://doi.org/10.1165/rcmb.2010-0097OC> PMID: 20802087
220. Mermis J, Gu H, Xue B, Li F, Tawfik O, Buch S, et al. Hypoxia-inducible factor-1  $\alpha$ /platelet derived growth factor axis in HIV-associated pulmonary vascular remodeling. *Respir Res*. 2011; 12:103. <https://doi.org/10.1186/1465-9921-12-103> PMID: 21819559
221. Lei Y, Zhang J, Schiavon CR, He M, Chen L, Shen H, et al. SARS-CoV-2 Spike Protein Impairs Endothelial Function via Downregulation of ACE 2. *Circ Res*. 2021; 128:1323–1326. <https://doi.org/10.1161/CIRCRESAHA.121.318902> PMID: 33784827
222. Qin W, Hu L, Zhang X, Jiang S, Li J, Zhang Z, et al. The Diverse Function of PD-1/PD-L Pathway Beyond Cancer. *Front Immunol*. 2019; 10:2298. <https://doi.org/10.3389/fimmu.2019.02298> PMID: 31636634
223. Lee JS, Park S, Jeong HW, Ahn JY, Choi SJ, Lee H, et al. Immunophenotyping of COVID-19 and influenza highlights the role of type I interferons in development of severe COVID-19. *Sci Immunol*. 2020; 5:eabd1554. <https://doi.org/10.1126/sciimmunol.abd1554> PMID: 32651212
224. Messner CB, Demichev V, Wendisch D, Michalick L, White M, Freiwald A, et al. Ultra-High-Throughput Clinical Proteomics Reveals Classifiers of COVID-19 Infection. *Cell Syst*. 2020; 11:11–24.e4. <https://doi.org/10.1016/j.cels.2020.05.012> PMID: 32619549
225. Vaz de Paula CB, de Azevedo MLV, Nagashima S, Martins APC, Malaquias MAS, Miggiolaro AFRDS, et al. IL-4/IL-13 remodeling pathway of COVID-19 lung injury. *Sci Rep*. 2020; 10:18689. <https://doi.org/10.1038/s41598-020-75659-5> PMID: 33122784
226. Becker Y. The changes in the T helper 1 (Th1) and T helper 2 (Th2) cytokine balance during HIV-1 infection are indicative of an allergic response to viral proteins that may be reversed by Th2 cytokine inhibitors and immune response modifiers—a review and hypothesis. *Virus Genes*. 2004; 28: 5–18. <https://doi.org/10.1023/B:VIRU.0000012260.32578.72> PMID: 14739648
227. Daley E, Emson C, Guignabert C, de Waal MR, Louten J, Kurup VP, et al. Pulmonary arterial remodeling induced by a Th2 immune response. *J Exp Med*. 2008; 205:361–372. <https://doi.org/10.1084/jem.20071008> PMID: 18227220
228. Oyeyemi OT, Okunlola OA, Adebayo AD. Assessment of schistosomiasis endemicity and preventive treatment on coronavirus disease 2019 outcomes in Africa. *New Microbes New Infect*. 2020 [cited 2020 Dec 11]. <https://doi.org/10.1016/j.nmni.2020.100821> PMID: 33251016
229. Liu Y, Zhang C, Huang F, Yang Y, Wang F, Yuan J, et al. Elevated plasma levels of selective cytokines in COVID-19 patients reflect viral load and lung injury. *Nat Sci Rev*. 2020; 7:1003–1011. <https://doi.org/10.1093/nsr/nwaa037> PMID: 34676126
230. de Lang A, Osterhaus ADME, Haagmans BL. Interferon- $\gamma$  and interleukin-4 downregulate expression of the SARS coronavirus receptor ACE2 in Vero E6 cells. *Virology*. 2006; 353:474–481. <https://doi.org/10.1016/j.virol.2006.06.011> PMID: 16860835

231. Kimura H, Francisco D, Conway M, Martinez FD, Vercelli D, Polverino F, et al. Type 2 inflammation modulates ACE2 and TMPRSS2 in airway epithelial cells. *J Allergy Clin Immunol*. 2020; 146:80–88. e8. <https://doi.org/10.1016/j.jaci.2020.05.004> PMID: 32422146
232. Ssebambulidde K, Segawa I, Abuga KM, Nakate V, Kayiira A, Ellis J, et al. Parasites and their protection against COVID-19- Ecology or Immunology? medRxiv. 2020; 2020.05.11.20098053. <https://doi.org/10.1101/2020.05.11.20098053>
233. COVID-19 situation reports. [cited 2020 Apr 18]. Available from: <https://www.who.int/emergencies/diseases/novel-coronavirus-2019/situation-reports>.
234. Wang EY, Mao T, Klein J, Dai Y, Huck JD, Liu F, et al. Diverse Functional Autoantibodies in Patients with COVID-19. medRxiv. 2020; 2020.12.10.20247205. <https://doi.org/10.1101/2020.12.10.20247205> PMID: 33330894
235. Rahima D, Tarrab-Hazdai R, Blank M, Arnon R, Shoenfeld Y. Anti-Nuclear Antibodies Associated with Schistosomiasis and Anti-Schistosomal Antibodies Associated with Sle. *Autoimmunity*. 1994; 17:127–139. <https://doi.org/10.3109/08916939409014668> PMID: 8061163
236. Kumar R, Lee MH, Mickael C, Kassa B, Pasha Q, Tuder R, et al. Pathophysiology and potential future therapeutic targets using preclinical models of COVID-19. *ERJ Open Res*. 2020; 6. <https://doi.org/10.1183/23120541.00405-2020> PMID: 33313306
237. Reis G, Silva EASM, Silva DCM, Thabane L, Milagres AC, Ferreira TS, et al. Effect of Early Treatment with Ivermectin among Patients with Covid-19. *N Engl J Med*. 2022; 386:1721–1731. <https://doi.org/10.1056/NEJMoa2115869> PMID: 35353979
238. Lim SCL, Hor CP, Tay KH, Mat Jelani A, Tan WH, Ker HB, et al. Efficacy of Ivermectin Treatment on Disease Progression Among Adults With Mild to Moderate COVID-19 and Comorbidities: The I-TECH Randomized Clinical Trial. *JAMA Intern Med*. 2022; 182:426–435. <https://doi.org/10.1001/jamainternmed.2022.0189> PMID: 35179551
239. Rezai MS, Ahangarkani F, Hill A, Ellis L, Mirchandani M, Davoudi A, et al. Non-effectiveness of Ivermectin on Inpatients and Outpatients With COVID-19; Results of Two Randomized, Double-Blinded, Placebo-Controlled Clinical Trials. *Front Med*. 2022; 9:919708. <https://doi.org/10.3389/fmed.2022.919708> PMID: 35783616
240. Schousboe P, Ronit A, Nielsen HB, Benfield T, Wiese L, Scoutaris N, et al. Reduced levels of pulmonary surfactant in COVID-19 ARDS. *Sci Rep*. 2022; 12:4040. <https://doi.org/10.1038/s41598-022-07944-4> PMID: 35260704
241. Landjerit B, Maton B, Peres G. In vivo muscular force analysis during the isometric flexion on a monkey's elbow. *J Biomech*. 1988; 21:577–584. [https://doi.org/10.1016/0021-9290\(88\)90220-5](https://doi.org/10.1016/0021-9290(88)90220-5) PMID: 3410860
242. Vibholm LK, Nielsen SSF, Pahus MH, Frattari GS, Olesen R, Andersen R, et al. SARS-CoV-2 persistence is associated with antigen-specific CD8 T-cell responses. *EBioMedicine*. 2021; 64:103230. <https://doi.org/10.1016/j.ebiom.2021.103230> PMID: 33530000
243. Puk O, Nowacka A, Smulewicz K, Mocna K, Bursiewicz W, Kęsy N, et al. Pulmonary artery targeted therapy in treatment of COVID-19 related ARDS. Literature review. *Biomed Pharmacother*. 2022; 146:112592. <https://doi.org/10.1016/j.biopha.2021.112592> PMID: 35062063
244. Singh P, Behera D, Gupta S, Deep A, Priyadarshini S, Padhan P. Nintedanib vs pirfenidone in the management of COVID-19 lung fibrosis: A single-centre study. *J R Coll Physicians Edinb*. 2022; 52:100–104. <https://doi.org/10.1177/14782715221103402> PMID: 36146989
245. Chu H, Chan JF-W, Yuen K-Y. Animal models in SARS-CoV-2 research. *Nat Methods*. 2022; 19:392–394. <https://doi.org/10.1038/s41592-022-01447-w> PMID: 35396468
246. Kumar R, Mickael C, Kassa B, Sanders L, Hernandez-Saavedra D, Koyanagi DE, et al. Interstitial macrophage-derived thrombospondin-1 contributes to hypoxia-induced pulmonary hypertension. *Cardiovasc Res*. 2020; 116:2021–2030. <https://doi.org/10.1093/cvr/cvz304> PMID: 31710666
247. Kay JM, Harris P, Heath D. Pulmonary hypertension produced in rats by ingestion of *Crotalaria spectabilis* seeds. *Thorax*. 1967; 22:176–179. <https://doi.org/10.1136/thx.22.2.176> PMID: 6033385
248. Taraseviciene-Stewart L, Kasahara Y, Alger L, Hirth P, Mc Mahon G, Waltenberger J, et al. Inhibition of the VEGF receptor 2 combined with chronic hypoxia causes cell death-dependent pulmonary endothelial cell proliferation and severe pulmonary hypertension. *FASEB J*. 2001; 15:427–438. <https://doi.org/10.1096/fj.00-0343com> PMID: 11156958
249. Han Y, Yang L, Lacko LA, Chen S. Human organoid models to study SARS-CoV-2 infection. *Nat Methods*. 2022; 19:418–428. <https://doi.org/10.1038/s41592-022-01453-y> PMID: 35396481
250. Valdoz JC, Franks NA, Cribbs CG, Jacobs DJ, Dodson EL, Knight CJ, et al. Soluble ECM promotes organotypic formation in lung alveolar model. *Biomaterials*. 2022; 283:121464. <https://doi.org/10.1016/j.biomaterials.2022.121464> PMID: 35306229

251. Al-Hilal TA, Keshavarz A, Kadry H, Lahooti B, Al-Obaida A, Ding Z, et al. Pulmonary-arterial-hypertension (PAH)-on-a-chip: fabrication, validation and application. *Lab Chip*. 2020; 20:3334–3345. <https://doi.org/10.1039/d0lc00605j> PMID: 32749432
252. Kumar R, Mickael C, Kassa B, Sanders L, Koyanagi D, Hernandez-Saavedra D, et al. Th2 CD4+ T Cells Are Necessary and Sufficient for Schistosoma-Pulmonary Hypertension. *J Am Heart Assoc*. 2019; 8:e013111. <https://doi.org/10.1161/JAHA.119.013111> PMID: 31339057
253. Gubernatorova EO, Gorshkova EA, Polinova AI, Drutskaya MS. IL-6: Relevance for immunopathology of SARS-CoV-2. *Cytokine Growth Factor Rev*. 2020; 53:13–24. <https://doi.org/10.1016/j.cytogfr.2020.05.009> PMID: 32475759
254. Costela-Ruiz VJ, Illescas-Montes R, Puerta-Puerta JM, Ruiz C, Melguizo-Rodríguez L. SARS-CoV-2 infection: The role of cytokines in COVID-19 disease. *Cytokine Growth Factor Rev*. 2020; 54:62–75. <https://doi.org/10.1016/j.cytogfr.2020.06.001> PMID: 32513566
255. Winkler ES, Bailey AL, Kafai NM, Nair S, McCune BT, Yu J, et al. SARS-CoV-2 infection of human ACE2-transgenic mice causes severe lung inflammation and impaired function. *Nat Immunol*. 2020; 21:1327–1335. <https://doi.org/10.1038/s41590-020-0778-2> PMID: 32839612
256. Israelow B, Song E, Mao T, Lu P, Meir A, Liu F, et al. Mouse model of SARS-CoV-2 reveals inflammatory role of type I interferon signaling. *J Exp Med*. 2020:217. <https://doi.org/10.1084/jem.20201241> PMID: 32750141
257. Cheke RS, Narkhede RR, Shinde SD, Ambhore JP, Jain PG. Repurposing of Anthelmintic Drugs against SARS-CoV-2 (Mpro and RdRp): Novel Disease, Older Therapeutics. *Lett Appl Nano-BioScience*. 2021; 10(2):2331–2338.
258. Heidary F, Gharebaghi R. Ivermectin: a systematic review from antiviral effects to COVID-19 complementary regimen. *J Antibiot (Tokyo)*. 2020; 73:593–602. <https://doi.org/10.1038/s41429-020-0336-z> PMID: 32533071
